# Supplementary material for: Superoxide-responsive quinone methide precursors (QMP-SOs) to study superoxide biology by proximity labeling and chemoproteomics
Source: Royal Society of Chemistry journal article supplement (doi:10.1039/d4cb00111g), 2024-01-01
Supplement: d4cb00111g3.xlsx [file d4cb00111g3.xlsx]

## Sheet: Table of content
Supplementary Data 1. Covalent modifications of bovine serum albumin (BSA) by QMP-SO-1
Worksheet	Description
Cys	QMP-SO-1-induced modifications on Cys residues of BSA
Asp	QMP-SO-1-induced modifications on Asp residues of BSA
Glu	QMP-SO-1-induced modifications on Glu residues of BSA
His	QMP-SO-1-induced modifications on His residues of BSA
Lys	QMP-SO-1-induced modifications on Lys residues of BSA
Arg	QMP-SO-1-induced modifications on Arg residues of BSA
Ser	QMP-SO-1-induced modifications on Ser residues of BSA
Thr	QMP-SO-1-induced modifications on Thr residues of BSA
Tyr	QMP-SO-1-induced modifications onTyr residues of BSA

## Sheet: Cys
Sequence	Modifications	Mass	Proteins	Acetyl (Protein N-term)	Oxidation (M)	QM (C)	Missed cleavages	Control	KO2 Treated	Modification_Control	Modification_Treated	Retention time	Calibrated retention time	Charges	PEP
ATEEQLKTVMENFVAFVDKCCAADDKEACFAVEGPK	Oxidation (M);3 QM (C);QM (E)	4375.97	sp|P02769|ALBU_BOVIN;CON__P02769	0	1	3	3		1	0	3	64.355	64.355	6	0.021016
CCAADDKEACFAVEGPK	QM (C)	1975.81	sp|P02769|ALBU_BOVIN;CON__P02769	0	0	1	1		2	0	2	38.245	38.245	2;3	1.3205e-24
CCTESLVNR	QM (C)	1186.51	sp|P02769|ALBU_BOVIN;CON__P02769;CON__P02768-1	0	0	1	0		1	0	1	31.992	31.992	2	7.4961e-06
CCTESLVNR	2 QM (C)	1235.53	sp|P02769|ALBU_BOVIN;CON__P02769;CON__P02768-1	0	0	2	0		1	0	2	49.402	49.402	2	8.0088e-05
CCTKPESER	QM (C)	1214.51	sp|P02769|ALBU_BOVIN;CON__P02769	0	0	1	1		1	0	1	19.181	19.181	3	0.033179
DAIPENLPPLTADFAEDKDVCK	QM (C)	2506.19	sp|P02769|ALBU_BOVIN;CON__P02769	0	0	1	1		3	0	3	90.774	90.774	2;3	2.3128e-20
DAIPENLPPLTADFAEDKDVCK	QM (C);QM (D)	2612.24	sp|P02769|ALBU_BOVIN;CON__P02769	0	0	1	1		1	0	1	96.277	96.277	3	0.027676
DAIPENLPPLTADFAEDKDVCKNYQEAK	QM (C);QM (E)	3345.58	sp|P02769|ALBU_BOVIN;CON__P02769	0	0	1	2		1	0	1	84.381	84.381	4	3.3495e-14
DAIPENLPPLTADFAEDKDVCKNYQEAK	QM (C);QM (D)	3345.58	sp|P02769|ALBU_BOVIN;CON__P02769	0	0	1	2		1	0	1	84.378	84.378	3	4.0909e-09
DDPHACYSTVFDK	QM (C)	1602.67	sp|P02769|ALBU_BOVIN;CON__P02769	0	0	1	0		2	0	2	55.065	55.065	2;3	8.0643e-05
DDSPDLPKLKPDPNTLCDEFK	QM (C);QM (K)	2598.22	sp|P02769|ALBU_BOVIN;CON__P02769	0	0	1	2		1	0	1	83.651	83.651	3	0.026242
EACFAVEGPK	QM (C);QM (E)	1261.57	sp|P02769|ALBU_BOVIN;CON__P02769	0	0	1	0	2	3	2	3	31.895	31.895	2	0.0042049
ECCHGDLLECADDR	QM (C)	1797.68	sp|P02769|ALBU_BOVIN;CON__P02769	0	0	1	0		6	0	6	39.982	39.982	2;3	8.0178e-61
ECCHGDLLECADDRADLAK	QM (C)	2295.96	sp|P02769|ALBU_BOVIN;CON__P02769	0	0	1	1		3	0	3	44.522	44.522	2;4	9.3068e-15
ETYGDMADCCEK	QM (C)	1526.54	sp|P02769|ALBU_BOVIN;CON__P02769	0	0	1	0		1	0	1	41.716	41.716	2	9.2795e-06
ETYGDMADCCEKQEPERNECFLSHK	Oxidation (M);2 QM (C)	3246.3	sp|P02769|ALBU_BOVIN;CON__P02769	0	1	2	2	1		2	0	20.218	20.218	4	0.018237
ETYGDMADCCEKQEPERNECFLSHK	2 QM (C)	3230.31	sp|P02769|ALBU_BOVIN;CON__P02769	0	0	2	2		1	0	2	20.909	20.909	4	0.013525
ETYGDMADCCEKQEPERNECFLSHKDDSPDLPK	Oxidation (M);2 QM (C)	4113.7	sp|P02769|ALBU_BOVIN;CON__P02769	0	1	2	3	1		2	0	23.829	23.829	6	0.0054774
EYEATLEECCAK	QM (C)	1550.63	sp|P02769|ALBU_BOVIN;CON__P02769	0	0	1	0		1	0	1	48.959	48.959	2	0.00053809
EYEATLEECCAK	2 QM (C)	1599.65	sp|P02769|ALBU_BOVIN;CON__P02769	0	0	2	0		1	0	2	69.507	69.507	2	3.496e-05
EYEATLEECCAKDDPHACYSTVFDK	2 QM (C)	3135.28	sp|P02769|ALBU_BOVIN;CON__P02769	0	0	2	1		1	0	2	58.335	58.335	3	0.030786
FKDLGEEHFKGLVLIAFSQYLQQCPFDEHVK	QM (C)	3770.88	sp|P02769|ALBU_BOVIN;CON__P02769	0	0	1	2	1	2	1	2	99.568	99.568	4;5;6	4.61e-40
FKDLGEEHFKGLVLIAFSQYLQQCPFDEHVK	QM (C);QM (Y)	3876.92	sp|P02769|ALBU_BOVIN;CON__P02769	0	0	1	2		3	0	3	100.86	100.86	4;5;6	8.0842e-31
GLVLIAFSQYLQQCPFDEHVK	QM (C)	2540.28	sp|P02769|ALBU_BOVIN;CON__P02769	0	0	1	0	3	10	3	10	104.58	104.58	2;3;4	9.1298e-187
HLVDEPQNLIKQNCDQFEK	QM (C);QM (K)	2509.19	sp|P02769|ALBU_BOVIN;CON__P02769	0	0	1	1		1	0	1	63.414	63.414	3	1.7312e-12
HLVDEPQNLIKQNCDQFEK	QM (C);QM (H)	2509.19	sp|P02769|ALBU_BOVIN;CON__P02769	0	0	1	1		1	0	1	63.414	63.414	3	6.3305e-14
LAKEYEATLEECCAK	QM (C);QM (E)	1968.88	sp|P02769|ALBU_BOVIN;CON__P02769	0	0	1	1		1	0	1	49.766	49.766	3	0.012695
LFTFHADICTLPDTEK	QM (C)	1955.93	sp|P02769|ALBU_BOVIN;CON__P02769	0	0	1	0		3	0	3	82.345	82.345	2;3	3.3765e-21
LFTFHADICTLPDTEKQIK	QM (C);QM (D)	2431.21	sp|P02769|ALBU_BOVIN;CON__P02769	0	0	1	1	1		1	0	89.634	89.634	3	0.034088
LKPDPNTLCDEFK	QM (C)	1624.78	sp|P02769|ALBU_BOVIN;CON__P02769	0	0	1	1		2	0	2	63.397	63.397	2;3	1.1997e-08
LKPDPNTLCDEFK	QM (C);QM (K)	1730.82	sp|P02769|ALBU_BOVIN;CON__P02769	0	0	1	1		1	0	1	68.72	68.72	3	0.016199
LKPDPNTLCDEFKADEK	QM (C)	2067.98	sp|P02769|ALBU_BOVIN;CON__P02769	0	0	1	2		3	0	3	57.897	57.897	2;3;4	1.5237e-21
LKPDPNTLCDEFKADEK	QM (C);QM (K)	2174.02	sp|P02769|ALBU_BOVIN;CON__P02769	0	0	1	2		1	0	1	64.301	64.301	3	8.212e-05
MPCTEDYLSLILNR	Oxidation (M);QM (C)	1788.84	sp|P02769|ALBU_BOVIN;CON__P02769	0	1	1	0		1	0	1	99.09	99.09	2	1.0335e-19
MPCTEDYLSLILNR	QM (C)	1772.85	sp|P02769|ALBU_BOVIN;CON__P02769	0	0	1	0		2	0	2	101.51	101.51	2;3	9.2467e-38
NECFLSHKDDSPDLPK	QM (C)	1949.88	sp|P02769|ALBU_BOVIN;CON__P02769	0	0	1	1		2	0	2	41.333	41.333	3;4	5.2399e-07
PESERMPCTEDYLSLILNR	QM (C);QM (D);QM (E)	2583.2	sp|P02769|ALBU_BOVIN;CON__P02769	0	0	1	1	1		1	0	90.546	90.546	3	0.033992
QNCDQFEKLGEYGFQNALIVR	QM (C);QM (D)	2683.27	sp|P02769|ALBU_BOVIN;CON__P02769	0	0	1	1		1	0	1	90.024	90.024	3	1.6049e-17
RHPYFYAPELLYYANKYNGVFQECCQAEDK	2 QM (C);QM (E)	3976.79	sp|P02769|ALBU_BOVIN;CON__P02769	0	0	2	2	1		2	0	91.156	91.156	3	0.00016522
RPCFSALTPDETYVPK	QM (C)	1928.93	sp|P02769|ALBU_BOVIN;CON__P02769	0	0	1	1		3	0	3	61.388	61.388	2;3	7.5678e-11
SHCIAEVEK	QM (C);QM (S)	1226.56	sp|P02769|ALBU_BOVIN;CON__P02769	0	0	1	0		1	0	1	31.906	31.906	2	0.0084833
SHCIAEVEKDAIPENLPPLTADFAEDKDVCK	QM (C)	3559.69	sp|P02769|ALBU_BOVIN;CON__P02769	0	0	1	2		3	0	3	76.147	76.147	3;4;5	9.4272e-31
SHCIAEVEKDAIPENLPPLTADFAEDKDVCK	QM (C);QM (E)	3665.73	sp|P02769|ALBU_BOVIN;CON__P02769	0	0	1	2		2	0	2	79.674	79.674	4;5	2.5424e-07
SHCIAEVEKDAIPENLPPLTADFAEDKDVCK	2 QM (C)	3608.71	sp|P02769|ALBU_BOVIN;CON__P02769	0	0	2	2		2	0	4	83.699	83.699	4;5	2.3196e-10
SLHTLFGDELCK	QM (C)	1467.71	sp|P02769|ALBU_BOVIN;CON__P02769	0	0	1	0		2	0	2	65.668	65.668	2;3	1.6358e-12
SLHTLFGDELCKVASLR	QM (C);QM (K)	2100.07	sp|P02769|ALBU_BOVIN;CON__P02769	0	0	1	1		1	0	1	82.392	82.392	4	1.4054e-06
TCVADESHAGCEK	QM (C)	1511.6	sp|P02769|ALBU_BOVIN;CON__P02769	0	0	1	0		1	0	1	19.896	19.896	3	0.0011568
TCVADESHAGCEKSLHTLFGDELCK	QM (C);QM (H)	3018.32	sp|P02769|ALBU_BOVIN;CON__P02769	0	0	1	1		1	0	1	61.091	61.091	4	7.674e-05
TCVADESHAGCEKSLHTLFGDELCK	QM (C);QM (E)	3018.32	sp|P02769|ALBU_BOVIN;CON__P02769	0	0	1	1		1	0	1	61.072	61.072	3	4.0438e-09
VTKCCTESLVNR	QM (C);QM (K)	1620.76	sp|P02769|ALBU_BOVIN;CON__P02769;CON__P02768-1	0	0	1	1		1	0	1	31.865	31.865	3	0.0011977
VTKCCTESLVNR	QM (C);QM (T)	1620.76	sp|P02769|ALBU_BOVIN;CON__P02769;CON__P02768-1	0	0	1	1		1	0	1	31.972	31.972	2	0.002696
YICDNQDTISSK	QM (C)	1491.66	sp|P02769|ALBU_BOVIN;CON__P02769	0	0	1	0		1	0	1	41.76	41.76	2	9.8363e-09
YICDNQDTISSKLK	QM (C);QM (Y)	1838.88	sp|P02769|ALBU_BOVIN;CON__P02769	0	0	1	1		1	0	1	53.897	53.897	3	4.9771e-10
YICDNQDTISSKLK	QM (C);QM (D)	1838.88	sp|P02769|ALBU_BOVIN;CON__P02769	0	0	1	1		1	0	1	53.97	53.97	2	0.012775
YNGVFQECCQAEDK	QM (C)	1795.72	sp|P02769|ALBU_BOVIN;CON__P02769	0	0	1	0		2	0	2	49.954	49.954	2	9.4274e-10

## Sheet: Asp
Sequence	Modifications	Mass	Proteins	Acetyl (Protein N-term)	Oxidation (M)	QM (D)	Missed cleavages	Control	KO2 Treated	Modification_Control	Modification_Treated	Retention time	Calibrated retention time	Charges	PEP
ADEKKFWGK	QM (D);QM (E)	1319.65	sp|P02769|ALBU_BOVIN;CON__P02769	0	0	1	2		1	0	1	25.828	25.828	3	0.029697
ADLAKYICDNQDTISSK	QM (D)	2046.96	sp|P02769|ALBU_BOVIN;CON__P02769	0	0	1	1		5	0	5	49.148	49.148	2;3	1.5033e-18
ADLAKYICDNQDTISSKLK	QM (D);QM (K)	2394.18	sp|P02769|ALBU_BOVIN;CON__P02769	0	0	1	2		1	0	1	60.758	60.758	3	9.1043e-15
AFDEKLFTFHADICTLPDTEK	QM (D)	2603.23	sp|P02769|ALBU_BOVIN;CON__P02769	0	0	1	1		3	0	3	78.462	78.462	2;3;4	7.7671e-30
AFDEKLFTFHADICTLPDTEK	QM (T);QM (D)	2709.27	sp|P02769|ALBU_BOVIN;CON__P02769	0	0	1	1		1	0	1	80.7	80.7	4	5.3977e-12
AFDEKLFTFHADICTLPDTEK	QM (D);QM (K)	2709.27	sp|P02769|ALBU_BOVIN;CON__P02769	0	0	1	1		1	0	1	80.7	80.7	4	0.00023161
ATEEQLKTVMENFVAFVDKCCAADDKEACFAVEGPK	QM (D);QM (K)	4318.96	sp|P02769|ALBU_BOVIN;CON__P02769	0	0	1	3		1	0	1	99.921	99.921	4	2.9072e-25
CCAADDKEACFAVEGPK	QM (D)	2032.83	sp|P02769|ALBU_BOVIN;CON__P02769	0	0	1	1		3	0	3	35.03	35.03	3	4.1725e-07
DAFLGSFLYEYSR	QM (D)	1672.78	sp|P02769|ALBU_BOVIN;CON__P02769	0	0	1	0		1	0	1	103.64	103.64	2	0.013691
DAIPENLPPLTADFAEDKDVCK	QM (D)	2563.22	sp|P02769|ALBU_BOVIN;CON__P02769	0	0	1	1		4	0	4	88.115	88.115	3	6.6195e-09
DAIPENLPPLTADFAEDKDVCK	QM (D);QM (E)	2669.26	sp|P02769|ALBU_BOVIN;CON__P02769	0	0	1	1		1	0	1	90.671	90.671	3	3.0197e-05
DAIPENLPPLTADFAEDKDVCK	QM (C);QM (D)	2612.24	sp|P02769|ALBU_BOVIN;CON__P02769	0	0	1	1		1	0	1	96.277	96.277	3	0.027676
DAIPENLPPLTADFAEDKDVCKNYQEAK	QM (D)	3296.55	sp|P02769|ALBU_BOVIN;CON__P02769	0	0	1	2		1	0	1	73.471	73.471	3	4.231e-16
DAIPENLPPLTADFAEDKDVCKNYQEAK	QM (D);QM (E)	3402.6	sp|P02769|ALBU_BOVIN;CON__P02769	0	0	1	2		2	0	2	78.181	78.181	3;4	0.00017541
DAIPENLPPLTADFAEDKDVCKNYQEAK	2 QM (D)	3402.6	sp|P02769|ALBU_BOVIN;CON__P02769	0	0	2	2		1	0	2	78.531	78.531	3	0.00058678
DAIPENLPPLTADFAEDKDVCKNYQEAK	QM (T);QM (D)	3402.6	sp|P02769|ALBU_BOVIN;CON__P02769	0	0	1	2		1	0	1	78.531	78.531	3	0.008411
DAIPENLPPLTADFAEDKDVCKNYQEAK	QM (C);QM (D)	3345.58	sp|P02769|ALBU_BOVIN;CON__P02769	0	0	1	2		1	0	1	84.378	84.378	3	4.0909e-09
DAIPENLPPLTADFAEDKDVCKNYQEAKDAFLGSFLYEYSR	QM (T);QM (D)	4951.32	sp|P02769|ALBU_BOVIN;CON__P02769	0	0	1	3		1	0	1	101.44	101.44	4	4.7278e-07
DAIPENLPPLTADFAEDKDVCKNYQEAKDAFLGSFLYEYSR	QM (D);QM (E)	4951.32	sp|P02769|ALBU_BOVIN;CON__P02769	0	0	1	3		1	0	1	101.44	101.44	4	0.0015333
DDPHACYSTVFDK	QM (D)	1659.69	sp|P02769|ALBU_BOVIN;CON__P02769	0	0	1	0		4	0	4	41.596	41.596	2;3	5.2775e-28
DDPHACYSTVFDKLK	QM (D)	1900.87	sp|P02769|ALBU_BOVIN;CON__P02769	0	0	1	1		7	0	7	55.135	55.135	2;3;4	3.1987e-07
DDPHACYSTVFDKLK	2 QM (D)	2006.91	sp|P02769|ALBU_BOVIN;CON__P02769	0	0	2	1		2	0	4	63.205	63.205	3;4	1.0944e-05
DDPHACYSTVFDKLKHLVDEPQNLIK	2 QM (D)	3293.61	sp|P02769|ALBU_BOVIN;CON__P02769	0	0	2	2		2	0	4	94.283	94.283	3;5	1.6535e-27
DDSPDLPKLKPDPNTLCDEFK	QM (D)	2549.2	sp|P02769|ALBU_BOVIN;CON__P02769	0	0	1	2		2	0	2	68.495	68.495	2;4	5.9433e-38
DDSPDLPKLKPDPNTLCDEFK	2 QM (D)	2655.24	sp|P02769|ALBU_BOVIN;CON__P02769	0	0	2	2		1	0	2	73.162	73.162	3	2.1549e-17
DDSPDLPKLKPDPNTLCDEFK	QM (D);QM (K)	2655.24	sp|P02769|ALBU_BOVIN;CON__P02769	0	0	1	2		1	0	1	73.162	73.162	3	3.0195e-06
DDSPDLPKLKPDPNTLCDEFKADEK	QM (D)	2992.4	sp|P02769|ALBU_BOVIN;CON__P02769	0	0	1	3	1	3	1	3	62.898	62.898	2;3;5	2.0431e-36
DTHKSEIAHR	QM (D)	1298.64	sp|P02769|ALBU_BOVIN;CON__P02769	0	0	1	1		1	0	1	18.608	18.608	3	0.0009262
ECCDKPLLEK	QM (D)	1396.64	sp|P02769|ALBU_BOVIN;CON__P02769	0	0	1	1		1	0	1	24.049	24.049	2	0.0030832
ECCDKPLLEKSHCIAEVEK	QM (D);QM (K)	2556.17	sp|P02769|ALBU_BOVIN;CON__P02769	0	0	1	2		2	0	2	36.494	36.494	3;4	1.7144e-10
ECCDKPLLEKSHCIAEVEK	QM (D);QM (E)	2556.17	sp|P02769|ALBU_BOVIN;CON__P02769	0	0	1	2		1	0	1	36.485	36.485	3	0.0017191
ECCHGDLLECADDR	QM (D)	1854.7	sp|P02769|ALBU_BOVIN;CON__P02769	0	0	1	0		1	0	1	34.792	34.792	3	0.03506
ECCHGDLLECADDRADLAKYICDNQDTISSK	QM (D)	3777.6	sp|P02769|ALBU_BOVIN;CON__P02769	0	0	1	2		1	0	1	65.089	65.089	4	1.2172e-31
ETYGDMADCCEKQEPER	Oxidation (M);QM (D)	2238.85	sp|P02769|ALBU_BOVIN;CON__P02769	0	1	1	1		1	0	1	20.416	20.416	2	2.201e-32
ETYGDMADCCEKQEPER	QM (D)	2222.86	sp|P02769|ALBU_BOVIN;CON__P02769	0	0	1	1		1	0	1	27.359	27.359	2	1.1126e-31
EYEATLEECCAKDDPHACYSTVFDK	QM (D)	3143.28	sp|P02769|ALBU_BOVIN;CON__P02769	0	0	1	1		2	0	2	51.965	51.965	3;4	1.4344e-08
FPKAEFVEVTKLVTDLTK	QM (T);QM (D)	2276.23	sp|P02769|ALBU_BOVIN;CON__P02769	0	0	1	2		2	0	2	93.425	93.425	3;4	4.1293e-12
GLVLIAFSQYLQQCPFDEHVK	QM (D)	2597.3	sp|P02769|ALBU_BOVIN;CON__P02769	0	0	1	0		2	0	2	102.39	102.39	2;3	1.8681e-15
HKPKATEEQLKTVMENFVAFVDK	QM (D);QM (K)	2900.48	sp|P02769|ALBU_BOVIN;CON__P02769	0	0	1	3		1	0	1	82.276	82.276	5	0.0086296
HLVDEPQNLIK	QM (D)	1410.75	sp|P02769|ALBU_BOVIN;CON__P02769	0	0	1	0		1	0	1	40.352	40.352	2	0.007225
HLVDEPQNLIKQNCDQFEKLGEYGFQNALIVR	QM (D);QM (E)	4026.99	sp|P02769|ALBU_BOVIN;CON__P02769	0	0	1	2		1	0	1	89.163	89.163	4	1.42e-43
HLVDEPQNLIKQNCDQFEKLGEYGFQNALIVR	QM (D);QM (K)	4026.99	sp|P02769|ALBU_BOVIN;CON__P02769	0	0	1	2		1	0	1	89.139	89.139	3	6.1998e-13
LFTFHADICTLPDTEK	QM (D)	2012.96	sp|P02769|ALBU_BOVIN;CON__P02769	0	0	1	0		1	0	1	69.507	69.507	2	6.2396e-11
LFTFHADICTLPDTEKQIK	QM (C);QM (D)	2431.21	sp|P02769|ALBU_BOVIN;CON__P02769	0	0	1	1	1		1	0	89.634	89.634	3	0.034088
LFTFHADICTLPDTEKQIK	QM (D)	2382.19	sp|P02769|ALBU_BOVIN;CON__P02769	0	0	1	1		3	0	3	65.54	65.54	3	3.3762e-12
LKHLVDEPQNLIK	QM (D)	1651.93	sp|P02769|ALBU_BOVIN;CON__P02769	0	0	1	1		2	0	2	37.819	37.819	3;4	0.0016128
LKPDPNTLCDEFK	QM (D);QM (K)	1787.84	sp|P02769|ALBU_BOVIN;CON__P02769	0	0	1	1		1	0	1	56.158	56.158	3	0.01075
LKPDPNTLCDEFKADEK	QM (D);QM (K)	2231.05	sp|P02769|ALBU_BOVIN;CON__P02769	0	0	1	2		4	0	4	50.215	50.215	2;3;4	4.3396e-14
LKPDPNTLCDEFKADEKK	QM (D);QM (K)	2359.14	sp|P02769|ALBU_BOVIN;CON__P02769	0	0	1	3		2	0	2	43.508	43.508	4	2.4919e-09
LVTDLTKVHKECCHGDLLECADDR	QM (T);QM (D)	3095.42	sp|P02769|ALBU_BOVIN;CON__P02769	0	0	1	2		3	0	3	43.885	43.885	3;4;5	1.6583e-21
NECFLSHKDDSPDLPKLKPDPNTLCDEFK	QM (D);QM (E)	3670.7	sp|P02769|ALBU_BOVIN;CON__P02769	0	0	1	3		2	0	2	63.559	63.559	5	1.4774e-20
NECFLSHKDDSPDLPKLKPDPNTLCDEFK	QM (S);QM (D)	3670.7	sp|P02769|ALBU_BOVIN;CON__P02769	0	0	1	3		1	0	1	63.854	63.854	3	5.5069e-11
NYQEAKDAFLGSFLYEYSR	QM (D)	2406.12	sp|P02769|ALBU_BOVIN;CON__P02769	0	0	1	1		3	0	3	89.347	89.347	3	2.6371e-11
NYQEAKDAFLGSFLYEYSR	QM (D);QM (E)	2512.16	sp|P02769|ALBU_BOVIN;CON__P02769	0	0	1	1		1	0	1	94.785	94.785	3	0.0016869
NYQEAKDAFLGSFLYEYSR	QM (D);QM (K)	2512.16	sp|P02769|ALBU_BOVIN;CON__P02769	0	0	1	1		1	0	1	94.844	94.844	2	2.6051e-18
PCFSALTPDETYVPK	QM (S);QM (T);QM (D);QM (Y)	2147.98	sp|P02769|ALBU_BOVIN;CON__P02769	0	0	1	0		1	0	1	104.56	104.56	2	0.035712
PDPNTLCDEFK	QM (D);QM (E)	1546.66	sp|P02769|ALBU_BOVIN;CON__P02769	0	0	1	0		1	0	1	27.124	27.124	2	0.030879
PDPNTLCDEFKADEK	QM (D)	1883.82	sp|P02769|ALBU_BOVIN;CON__P02769	0	0	1	1		1	0	1	44.691	44.691	3	6.3589e-05
PDPNTLCDEFKADEK	QM (D);QM (E)	1989.87	sp|P02769|ALBU_BOVIN;CON__P02769	0	0	1	1		1	0	1	50.818	50.818	3	0.0010527
PESERMPCTEDYLSLILNR	QM (C);QM (D);QM (E)	2583.2	sp|P02769|ALBU_BOVIN;CON__P02769	0	0	1	1	1		1	0	90.546	90.546	3	0.033992
QNCDQFEKLGEYGFQNALIVR	QM (D)	2634.25	sp|P02769|ALBU_BOVIN;CON__P02769	0	0	1	1		1	0	1	81.211	81.211	3	3.7555e-24
QNCDQFEKLGEYGFQNALIVR	QM (D);QM (E)	2740.3	sp|P02769|ALBU_BOVIN;CON__P02769	0	0	1	1		1	0	1	84.717	84.717	3	1.2126e-08
QNCDQFEKLGEYGFQNALIVR	QM (C);QM (D)	2683.27	sp|P02769|ALBU_BOVIN;CON__P02769	0	0	1	1		1	0	1	90.024	90.024	3	1.6049e-17
RPCFSALTPDETYVPKAFDEK	QM (D)	2576.23	sp|P02769|ALBU_BOVIN;CON__P02769	0	0	1	2		3	0	3	60.396	60.396	2;4	4.2866e-24
SHCIAEVEKDAIPENLPPLTADFAEDK	QM (T);2 QM (D);QM (E);QM (K)	3538.65	sp|P02769|ALBU_BOVIN;CON__P02769	0	0	2	1	1	1	2	2	77.784	77.784	4	2.5147e-05
SHCIAEVEKDAIPENLPPLTADFAEDKDVCK	QM (D)	3616.71	sp|P02769|ALBU_BOVIN;CON__P02769	0	0	1	2		2	0	2	70.019	70.019	3;4	1.5407e-22
SHCIAEVEKDAIPENLPPLTADFAEDKDVCK	2 QM (D)	3722.75	sp|P02769|ALBU_BOVIN;CON__P02769	0	0	2	2		1	0	2	73.561	73.561	4	0.010643
SHCIAEVEKDAIPENLPPLTADFAEDKDVCK	QM (D);QM (K)	3722.75	sp|P02769|ALBU_BOVIN;CON__P02769	0	0	1	2		3	0	3	75.325	75.325	3;4	9.3641e-16
SHCIAEVEKDAIPENLPPLTADFAEDKDVCK	QM (D);QM (E)	3722.75	sp|P02769|ALBU_BOVIN;CON__P02769	0	0	1	2		1	0	1	74.965	74.965	4	1.0566e-05
SHCIAEVEKDAIPENLPPLTADFAEDKDVCK	QM (T);QM (D)	3722.75	sp|P02769|ALBU_BOVIN;CON__P02769	0	0	1	2		1	0	1	74.962	74.962	3	5.7816e-16
SHCIAEVEKDAIPENLPPLTADFAEDKDVCKNYQEAK	QM (D)	4350.05	sp|P02769|ALBU_BOVIN;CON__P02769	0	0	1	3		1	0	1	65.414	65.414	3	5.9e-13
SHCIAEVEKDAIPENLPPLTADFAEDKDVCKNYQEAK	QM (D);QM (E)	4456.09	sp|P02769|ALBU_BOVIN;CON__P02769	0	0	1	3		2	0	2	68.619	68.619	6	1.1505e-12
SHCIAEVEKDAIPENLPPLTADFAEDKDVCKNYQEAK	QM (D);QM (K)	4456.09	sp|P02769|ALBU_BOVIN;CON__P02769	0	0	1	3		1	0	1	69.103	69.103	4	1.4744e-26
SLHTLFGDELCK	QM (D)	1524.73	sp|P02769|ALBU_BOVIN;CON__P02769	0	0	1	0		2	0	2	53.909	53.909	2;3	0.001305
SLHTLFGDELCKVASLR	QM (D)	2051.05	sp|P02769|ALBU_BOVIN;CON__P02769	0	0	1	1		1	0	1	72.604	72.604	2	4.5892e-11
TCVADESHAGCEKSLHTLFGDELCK	QM (D)	2969.3	sp|P02769|ALBU_BOVIN;CON__P02769	0	0	1	1		2	0	2	47.434	47.434	3;5	3.5683e-08
TCVADESHAGCEKSLHTLFGDELCKVASLR	QM (D);QM (E)	3601.66	sp|P02769|ALBU_BOVIN;CON__P02769	0	0	1	2		1	0	1	66.835	66.835	5	1.4553e-09
TVMENFVAFVDKCCAADDK	QM (D)	2325.01	sp|P02769|ALBU_BOVIN;CON__P02769	0	0	1	1		1	0	1	82.649	82.649	2	8.8928e-25
TVMENFVAFVDKCCAADDKEACFAVEGPK	QM (T);2 QM (D);QM (E);QM (K)	3837.68	sp|P02769|ALBU_BOVIN;CON__P02769	0	0	2	2		1	0	2	26.915	26.915	5	0.017314
TVMENFVAFVDKCCAADDKEACFAVEGPK	QM (D);QM (K)	3519.55	sp|P02769|ALBU_BOVIN;CON__P02769	0	0	1	2		1	0	1	88.503	88.503	3	9.6849e-40
VHKECCHGDLLECADDR	QM (D)	2218.92	sp|P02769|ALBU_BOVIN;CON__P02769	0	0	1	1		1	0	1	24.052	24.052	4	0.0097977
YICDNQDTISSKLK	QM (C);QM (D)	1838.88	sp|P02769|ALBU_BOVIN;CON__P02769	0	0	1	1		1	0	1	53.97	53.97	2	0.012775
YICDNQDTISSKLKECCDKPLLEK	QM (D);QM (Y)	3168.48	sp|P02769|ALBU_BOVIN;CON__P02769	0	0	1	3		2	0	2	50.891	50.891	3;5	3.9392e-30

## Sheet: Glu
Sequence	Modifications	Mass	Proteins	Acetyl (Protein N-term)	Oxidation (M)	QM (E)	Missed cleavages	Control	KO2 Treated	Modification_Control	Modification_Treated	Retention time	Calibrated retention time	Charges	PEP
ADEKKFWGK	QM (D);QM (E)	1319.65	sp|P02769|ALBU_BOVIN;CON__P02769	0	0	1	2		1	0	1	25.828	25.828	3	0.029697
AEFVEVTKLVTDLTK	QM (E)	1797.98	sp|P02769|ALBU_BOVIN;CON__P02769	0	0	1	1		9	0	9	82.845	82.845	2;3	1.5953e-14
AEFVEVTKLVTDLTK	2 QM (E)	1904.02	sp|P02769|ALBU_BOVIN;CON__P02769	0	0	2	1		1	0	2	88.113	88.113	3	0.00027096
AEFVEVTKLVTDLTK	QM (T);QM (E)	1904.02	sp|P02769|ALBU_BOVIN;CON__P02769	0	0	1	1		1	0	1	88.138	88.138	2	0.00028583
AEFVEVTKLVTDLTKVHK	QM (T);QM (E)	2268.24	sp|P02769|ALBU_BOVIN;CON__P02769	0	0	1	2		1	0	1	76.674	76.674	4	1.3553e-10
AEFVEVTKLVTDLTKVHK	2 QM (E)	2268.24	sp|P02769|ALBU_BOVIN;CON__P02769	0	0	2	2		1	0	2	76.67	76.67	5	5.482e-12
AEFVEVTKLVTDLTKVHK	QM (E)	2162.2	sp|P02769|ALBU_BOVIN;CON__P02769	0	0	1	2		1	0	1	76.679	76.679	4	4.7561e-19
AFDEKLFTFHADICTLPDTEK	QM (E)	2603.23	sp|P02769|ALBU_BOVIN;CON__P02769	0	0	1	1		2	0	2	77.82	77.82	3	5.3148e-24
AFDEKLFTFHADICTLPDTEK	QM (E);QM (K)	2709.27	sp|P02769|ALBU_BOVIN;CON__P02769	0	0	1	1		1	0	1	80.661	80.661	3	3.8292e-17
AFDEKLFTFHADICTLPDTEKQIK	QM (T);QM (E)	3078.5	sp|P02769|ALBU_BOVIN;CON__P02769	0	0	1	2		3	0	3	74.308	74.308	3;4;5	3.4374e-31
ATEEQLKTVMENFVAFVDK	Oxidation (M);QM (E)	2320.13	sp|P02769|ALBU_BOVIN;CON__P02769	0	1	1	1		2	0	2	81.386	81.386	2	5.453e-19
ATEEQLKTVMENFVAFVDK	QM (E)	2304.13	sp|P02769|ALBU_BOVIN;CON__P02769	0	0	1	1		1	0	1	101.28	101.28	2	2.3283e-14
ATEEQLKTVMENFVAFVDK	QM (T);QM (E)	2410.18	sp|P02769|ALBU_BOVIN;CON__P02769	0	0	1	1		1	0	1	102.17	102.17	3	1.6569e-11
ATEEQLKTVMENFVAFVDKCCAADDKEACFAVEGPK	Oxidation (M);3 QM (C);QM (E)	4375.97	sp|P02769|ALBU_BOVIN;CON__P02769	0	1	1	3		1	0	1	64.355	64.355	6	0.021016
DAIPENLPPLTADFAEDKDVCK	QM (E)	2563.22	sp|P02769|ALBU_BOVIN;CON__P02769	0	0	1	1		7	0	7	87.325	87.325	2;3	3.773e-20
DAIPENLPPLTADFAEDKDVCK	QM (D);QM (E)	2669.26	sp|P02769|ALBU_BOVIN;CON__P02769	0	0	1	1		1	0	1	90.671	90.671	3	3.0197e-05
DAIPENLPPLTADFAEDKDVCKNYQEAK	QM (E)	3296.55	sp|P02769|ALBU_BOVIN;CON__P02769	0	0	1	2		2	0	2	73.473	73.473	3;4	3.4497e-23
DAIPENLPPLTADFAEDKDVCKNYQEAK	QM (D);QM (E)	3402.6	sp|P02769|ALBU_BOVIN;CON__P02769	0	0	1	2		2	0	2	78.181	78.181	3;4	0.00017541
DAIPENLPPLTADFAEDKDVCKNYQEAK	QM (E);QM (K)	3402.6	sp|P02769|ALBU_BOVIN;CON__P02769	0	0	1	2		1	0	1	78.531	78.531	3	0.028525
DAIPENLPPLTADFAEDKDVCKNYQEAK	QM (C);QM (E)	3345.58	sp|P02769|ALBU_BOVIN;CON__P02769	0	0	1	2		1	0	1	84.381	84.381	4	3.3495e-14
DAIPENLPPLTADFAEDKDVCKNYQEAKDAFLGSFLYEYSR	QM (D);QM (E)	4951.32	sp|P02769|ALBU_BOVIN;CON__P02769	0	0	1	3		1	0	1	101.44	101.44	4	0.0015333
EACFAVEGPK	QM (C);QM (E)	1261.57	sp|P02769|ALBU_BOVIN;CON__P02769	0	0	1	0	2	3	2	3	31.895	31.895	2	0.0042049
EACFAVEGPK	2 QM (E)	1318.59	sp|P02769|ALBU_BOVIN;CON__P02769	0	0	2	0		1	0	2	34.463	34.463	2	0.034801
EACFAVEGPKLVVSTQTALA	QM (E)	2196.11	sp|P02769|ALBU_BOVIN;CON__P02769	0	0	1	1		1	0	1	85.455	85.455	3	0.01488
ECCDKPLLEK	QM (E)	1396.64	sp|P02769|ALBU_BOVIN;CON__P02769	0	0	1	1		1	0	1	23.975	23.975	3	9.9111e-05
ECCDKPLLEKSHCIAEVEK	QM (E)	2450.13	sp|P02769|ALBU_BOVIN;CON__P02769	0	0	1	2		3	0	3	31.183	31.183	3;4;5	3.0451e-19
ECCDKPLLEKSHCIAEVEK	QM (D);QM (E)	2556.17	sp|P02769|ALBU_BOVIN;CON__P02769	0	0	1	2		1	0	1	36.485	36.485	3	0.0017191
ECCDKPLLEKSHCIAEVEKDAIPENLPPLTADFAEDK	QM (E)	4387.07	sp|P02769|ALBU_BOVIN;CON__P02769	0	0	1	3		3	0	3	78.783	78.783	4;5;6	4.9787e-48
ECCHGDLLECADDR	QM (E)	1854.7	sp|P02769|ALBU_BOVIN;CON__P02769	0	0	1	0		1	0	1	32.475	32.475	2	5.8815e-05
ECCHGDLLECADDRADLAKYICDNQDTISSK	QM (E)	3777.6	sp|P02769|ALBU_BOVIN;CON__P02769	0	0	1	2		1	0	1	65.078	65.078	5	3.0446e-40
ETYGDMADCCEKQEPER	QM (E);QM (K)	2328.9	sp|P02769|ALBU_BOVIN;CON__P02769	0	0	1	1		2	0	2	22.205	22.205	3;4	8.3848e-05
ETYGDMADCCEKQEPER	Oxidation (M);QM (E)	2238.85	sp|P02769|ALBU_BOVIN;CON__P02769	0	1	1	1		2	0	2	24.753	24.753	3	6.31e-07
ETYGDMADCCEKQEPER	QM (E)	2222.86	sp|P02769|ALBU_BOVIN;CON__P02769	0	0	1	1		1	0	1	27.384	27.384	3	1.3811e-24
ETYGDMADCCEKQEPERNECFLSHK	Oxidation (M);QM (E)	3254.3	sp|P02769|ALBU_BOVIN;CON__P02769	0	1	1	2		1	0	1	26.705	26.705	5	2.3938e-30
ETYGDMADCCEKQEPERNECFLSHKDDSPDLPK	Oxidation (M);QM (E)	4121.7	sp|P02769|ALBU_BOVIN;CON__P02769	0	1	1	3		3	0	3	35.104	35.104	4;5;6	7.9459e-25
EYEATLEECCAK	QM (E)	1607.65	sp|P02769|ALBU_BOVIN;CON__P02769	0	0	1	0		2	0	2	41.046	41.046	2	1.3582e-26
EYEATLEECCAKDDPHACYSTVFDK	QM (E)	3143.28	sp|P02769|ALBU_BOVIN;CON__P02769	0	0	1	1		1	0	1	51.964	51.964	3	3.2555e-20
EYEATLEECCAKDDPHACYSTVFDK	QM (T);QM (E)	3249.33	sp|P02769|ALBU_BOVIN;CON__P02769	0	0	1	1		1	0	1	57.612	57.612	3	0.00011759
EYEATLEECCAKDDPHACYSTVFDKLK	2 QM (E)	3490.5	sp|P02769|ALBU_BOVIN;CON__P02769	0	0	2	2		2	0	4	61.561	61.561	3;4	1.9215e-29
EYEATLEECCAKDDPHACYSTVFDKLK	QM (E);QM (Y)	3490.5	sp|P02769|ALBU_BOVIN;CON__P02769	0	0	1	2		2	0	2	61.565	61.565	4;5	2.8493e-20
FKDLGEEHFK	2 QM (E)	1460.7	sp|P02769|ALBU_BOVIN;CON__P02769	0	0	2	1		1	0	2	30.713	30.713	3	0.034908
FPKAEFVEVTK	QM (E)	1399.74	sp|P02769|ALBU_BOVIN;CON__P02769	0	0	1	1		2	0	2	42.91	42.91	3	0.0035083
GACLLPKIETMR	QM (E);QM (K)	1599.82	sp|P02769|ALBU_BOVIN;CON__P02769	0	0	1	1		1	0	1	57.188	57.188	3	0.035357
GLVLIAFSQYLQQCPFDEHVK	QM (E)	2597.3	sp|P02769|ALBU_BOVIN;CON__P02769	0	0	1	0		1	0	1	102.42	102.42	2	1.6946e-47
HLVDEPQNLIKQNCDQFEK	QM (E)	2460.17	sp|P02769|ALBU_BOVIN;CON__P02769	0	0	1	1		3	0	3	48.902	48.902	3;4	2.3062e-19
HLVDEPQNLIKQNCDQFEKLGEYGFQNALIVR	QM (D);QM (E)	4026.99	sp|P02769|ALBU_BOVIN;CON__P02769	0	0	1	2		1	0	1	89.163	89.163	4	1.42e-43
HLVDEPQNLIKQNCDQFEKLGEYGFQNALIVR	QM (E);QM (Y)	4026.99	sp|P02769|ALBU_BOVIN;CON__P02769	0	0	1	2		1	0	1	89.124	89.124	5	2.8557e-42
HPEYAVSVLLR	QM (E);QM (H)	1494.79	sp|P02769|ALBU_BOVIN;CON__P02769	0	0	1	0	1		1	0	51.397	51.397	3	0.001159
LAKEYEATLEECCAK	QM (E);QM (K)	2025.91	sp|P02769|ALBU_BOVIN;CON__P02769	0	0	1	1		1	0	1	39.912	39.912	2	4.7209e-08
LAKEYEATLEECCAK	QM (E)	1919.86	sp|P02769|ALBU_BOVIN;CON__P02769	0	0	1	1		2	0	2	32.668	32.668	2;3	0.002467
LAKEYEATLEECCAK	QM (C);QM (E)	1968.88	sp|P02769|ALBU_BOVIN;CON__P02769	0	0	1	1		1	0	1	49.766	49.766	3	0.012695
LAKEYEATLEECCAKDDPHACYSTVFDK	QM (T);QM (E)	3561.54	sp|P02769|ALBU_BOVIN;CON__P02769	0	0	1	2		1	0	1	52.854	52.854	3	0.015651
LCVLHEKTPVSEK	QM (E);QM (K)	1750.9	sp|P02769|ALBU_BOVIN;CON__P02769	0	0	1	1		1	0	1	29.477	29.477	3	0.006763
LCVLHEKTPVSEKVTK	QM (E);QM (H)	2079.11	sp|P02769|ALBU_BOVIN;CON__P02769	0	0	1	2		3	0	3	27.199	27.199	3;4;5	0.0012477
LFTFHADICTLPDTEKQIK	QM (E)	2382.19	sp|P02769|ALBU_BOVIN;CON__P02769	0	0	1	1		1	0	1	64.333	64.333	3	1.0424e-10
LFTFHADICTLPDTEKQIK	QM (T);QM (E)	2488.23	sp|P02769|ALBU_BOVIN;CON__P02769	0	0	1	1		1	0	1	81.509	81.509	4	0.00014018
LFTFHADICTLPDTEKQIKK	QM (T);QM (E)	2616.33	sp|P02769|ALBU_BOVIN;CON__P02769	0	0	1	2		2	0	2	58.758	58.758	3;4	0.00057635
LKECCDKPLLEK	QM (E)	1637.82	sp|P02769|ALBU_BOVIN;CON__P02769	0	0	1	2		1	0	1	20.227	20.227	2	0.0049579
LKECCDKPLLEKSHCIAEVEK	QM (E)	2691.31	sp|P02769|ALBU_BOVIN;CON__P02769	0	0	1	3		2	0	2	27.743	27.743	3;4	7.8322e-09
LKECCDKPLLEKSHCIAEVEK	QM (E);QM (K)	2797.35	sp|P02769|ALBU_BOVIN;CON__P02769	0	0	1	3		6	0	6	31.338	31.338	3;4;5	3.266e-24
LKHLVDEPQNLIK	QM (E)	1651.93	sp|P02769|ALBU_BOVIN;CON__P02769	0	0	1	1		1	0	1	37.495	37.495	4	0.0015386
LSQKFPKAEFVEVTK	QM (E);QM (K)	1962.05	sp|P02769|ALBU_BOVIN;CON__P02769	0	0	1	2		1	0	1	43.926	43.926	3	0.03253
LVNELTEFAK	QM (E)	1268.67	sp|P02769|ALBU_BOVIN;CON__P02769	0	0	1	0		1	0	1	64.516	64.516	2	0.0007254
LVNELTEFAKTCVADESHAGCEK	QM (E)	2713.24	sp|P02769|ALBU_BOVIN;CON__P02769	0	0	1	1		2	0	2	61.388	61.388	3;4	9.519e-55
LVNELTEFAKTCVADESHAGCEK	QM (T);QM (E)	2819.28	sp|P02769|ALBU_BOVIN;CON__P02769	0	0	1	1		1	0	1	66.488	66.488	3	4.0523e-10
MPCTEDYLSLILNR	QM (E)	1829.87	sp|P02769|ALBU_BOVIN;CON__P02769	0	0	1	0		2	0	2	90.732	90.732	2;3	1.8229e-13
NECFLSHKDDSPDLPK	QM (E)	2006.9	sp|P02769|ALBU_BOVIN;CON__P02769	0	0	1	1		12	0	12	36.222	36.222	3;4	4.3396e-11
NECFLSHKDDSPDLPK	QM (S);QM (E)	2112.95	sp|P02769|ALBU_BOVIN;CON__P02769	0	0	1	1		1	0	1	43.631	43.631	3	0.032154
NECFLSHKDDSPDLPKLKPDPNTLCDEFK	QM (E)	3564.65	sp|P02769|ALBU_BOVIN;CON__P02769	0	0	1	3		2	0	2	59.795	59.795	4;5	1.7099e-15
NECFLSHKDDSPDLPKLKPDPNTLCDEFK	QM (D);QM (E)	3670.7	sp|P02769|ALBU_BOVIN;CON__P02769	0	0	1	3		2	0	2	63.559	63.559	5	1.4774e-20
NYQEAKDAFLGSFLYEYSR	QM (E)	2406.12	sp|P02769|ALBU_BOVIN;CON__P02769	0	0	1	1		3	0	3	87.399	87.399	2;3	1.1246e-10
NYQEAKDAFLGSFLYEYSR	QM (D);QM (E)	2512.16	sp|P02769|ALBU_BOVIN;CON__P02769	0	0	1	1		1	0	1	94.785	94.785	3	0.0016869
PCFSALTPDETYVPK	QM (T);QM (E)	1935.9	sp|P02769|ALBU_BOVIN;CON__P02769	0	0	1	0	1		1	0	55.336	55.336	2	0.034026
PDPNTLCDEFK	QM (D);QM (E)	1546.66	sp|P02769|ALBU_BOVIN;CON__P02769	0	0	1	0		1	0	1	27.124	27.124	2	0.030879
PDPNTLCDEFKADEK	QM (D);QM (E)	1989.87	sp|P02769|ALBU_BOVIN;CON__P02769	0	0	1	1		1	0	1	50.818	50.818	3	0.0010527
PESERMPCTEDYLSLILNR	QM (C);QM (D);QM (E)	2583.2	sp|P02769|ALBU_BOVIN;CON__P02769	0	0	1	1	1		1	0	90.546	90.546	3	0.033992
PLLEKSHCIAEVEK	QM (E)	1757.9	sp|P02769|ALBU_BOVIN;CON__P02769	0	0	1	1		1	0	1	29.874	29.874	2	4.6544e-14
PLLEKSHCIAEVEKDAIPENLPPLTADFAEDKDVCK	QM (E)	4197.06	sp|P02769|ALBU_BOVIN;CON__P02769	0	0	1	3		1	0	1	74.56	74.56	4	6.4995e-19
QEPERNECFLSHKDDSPDLPK	QM (E)	2646.2	sp|P02769|ALBU_BOVIN;CON__P02769	0	0	1	2		4	0	4	30.657	30.657	4;5	2.4228e-13
QNCDQFEKLGEYGFQNALIVR	QM (E)	2634.25	sp|P02769|ALBU_BOVIN;CON__P02769	0	0	1	1		3	0	3	82.54	82.54	2;3	5.4444e-47
QNCDQFEKLGEYGFQNALIVR	QM (E);QM (K)	2740.3	sp|P02769|ALBU_BOVIN;CON__P02769	0	0	1	1		1	0	1	84.717	84.717	3	1.0508e-17
QNCDQFEKLGEYGFQNALIVR	QM (D);QM (E)	2740.3	sp|P02769|ALBU_BOVIN;CON__P02769	0	0	1	1		1	0	1	84.717	84.717	3	1.2126e-08
RHPEYAVSVLLRLAKEYEATLEECCAK	QM (E);QM (Y)	3446.7	sp|P02769|ALBU_BOVIN;CON__P02769	0	0	1	3		1	0	1	96.819	96.819	5	6.9204e-06
RHPYFYAPELLYYANK	QM (E)	2150.06	sp|P02769|ALBU_BOVIN;CON__P02769	0	0	1	1		1	0	1	68.53	68.53	4	0.022593
RHPYFYAPELLYYANKYNGVFQECCQAEDK	2 QM (C);QM (E)	3976.79	sp|P02769|ALBU_BOVIN;CON__P02769	0	0	1	2	1		1	0	91.156	91.156	3	0.00016522
RPCFSALTPDETYVPKAFDEKLFTFHADICTLPDTEK	QM (E);QM (K)	4571.17	sp|P02769|ALBU_BOVIN;CON__P02769	0	0	1	3		1	0	1	89.26	89.26	6	0.0030543
SHCIAEVEKDAIPENLPPLTADFAEDK	QM (T);2 QM (D);QM (E);QM (K)	3538.65	sp|P02769|ALBU_BOVIN;CON__P02769	0	0	1	1	1	1	1	1	77.784	77.784	4	2.5147e-05
SHCIAEVEKDAIPENLPPLTADFAEDK	QM (E)	3114.49	sp|P02769|ALBU_BOVIN;CON__P02769	0	0	1	1		2	0	2	76.942	76.942	3;4	2.3442e-21
SHCIAEVEKDAIPENLPPLTADFAEDKDVCK	QM (E)	3616.71	sp|P02769|ALBU_BOVIN;CON__P02769	0	0	1	2	2	11	2	11	70.591	70.591	3;4;5	2.0726e-30
SHCIAEVEKDAIPENLPPLTADFAEDKDVCK	QM (T);QM (E)	3722.75	sp|P02769|ALBU_BOVIN;CON__P02769	0	0	1	2		1	0	1	73.561	73.561	4	3.3555e-07
SHCIAEVEKDAIPENLPPLTADFAEDKDVCK	QM (D);QM (E)	3722.75	sp|P02769|ALBU_BOVIN;CON__P02769	0	0	1	2		1	0	1	74.965	74.965	4	1.0566e-05
SHCIAEVEKDAIPENLPPLTADFAEDKDVCK	QM (E);QM (K)	3722.75	sp|P02769|ALBU_BOVIN;CON__P02769	0	0	1	2		1	0	1	74.959	74.959	5	2.5714e-15
SHCIAEVEKDAIPENLPPLTADFAEDKDVCK	QM (C);QM (E)	3665.73	sp|P02769|ALBU_BOVIN;CON__P02769	0	0	1	2		2	0	2	79.674	79.674	4;5	2.5424e-07
SHCIAEVEKDAIPENLPPLTADFAEDKDVCKNYQEAK	QM (E)	4350.05	sp|P02769|ALBU_BOVIN;CON__P02769	0	0	1	3		3	0	3	65.425	65.425	3;4;6	5.4983e-47
SHCIAEVEKDAIPENLPPLTADFAEDKDVCKNYQEAK	QM (E);QM (K)	4456.09	sp|P02769|ALBU_BOVIN;CON__P02769	0	0	1	3		1	0	1	68.135	68.135	5	3.5297e-13
SHCIAEVEKDAIPENLPPLTADFAEDKDVCKNYQEAK	QM (D);QM (E)	4456.09	sp|P02769|ALBU_BOVIN;CON__P02769	0	0	1	3		2	0	2	68.619	68.619	6	1.1505e-12
SLHTLFGDELCK	QM (E)	1524.73	sp|P02769|ALBU_BOVIN;CON__P02769	0	0	1	0		2	0	2	58.115	58.115	2	1.8912e-06
SLHTLFGDELCKVASLR	QM (E)	2051.05	sp|P02769|ALBU_BOVIN;CON__P02769	0	0	1	1		1	0	1	72.604	72.604	2	1.6529e-09
TCVADESHAGCEK	QM (E)	1568.62	sp|P02769|ALBU_BOVIN;CON__P02769	0	0	1	0		1	0	1	19.284	19.284	3	0.012996
TCVADESHAGCEKSLHTLFGDELCK	QM (E)	2969.3	sp|P02769|ALBU_BOVIN;CON__P02769	0	0	1	1		3	0	3	47.44	47.44	3;4;5	9.5769e-09
TCVADESHAGCEKSLHTLFGDELCK	QM (C);QM (E)	3018.32	sp|P02769|ALBU_BOVIN;CON__P02769	0	0	1	1		1	0	1	61.072	61.072	3	4.0438e-09
TCVADESHAGCEKSLHTLFGDELCKVASLR	QM (D);QM (E)	3601.66	sp|P02769|ALBU_BOVIN;CON__P02769	0	0	1	2		1	0	1	66.835	66.835	5	1.4553e-09
TPVSEKVTKCCTESLVNR	QM (S);QM (E)	2319.12	sp|P02769|ALBU_BOVIN;CON__P02769	0	0	1	2		1	0	1	31.008	31.008	4	1.1181e-10
TPVSEKVTKCCTESLVNR	QM (T);QM (E)	2319.12	sp|P02769|ALBU_BOVIN;CON__P02769	0	0	1	2		1	0	1	31.006	31.006	3	1.3748e-11
TVMENFVAFVDKCCAADDK	Oxidation (M);QM (E)	2341.01	sp|P02769|ALBU_BOVIN;CON__P02769	0	1	1	1		1	0	1	65.031	65.031	3	4.1165e-11
TVMENFVAFVDKCCAADDK	QM (E)	2325.01	sp|P02769|ALBU_BOVIN;CON__P02769	0	0	1	1		1	0	1	82.673	82.673	3	1.5337e-08
TVMENFVAFVDKCCAADDKEACFAVEGPK	QM (T);2 QM (D);QM (E);QM (K)	3837.68	sp|P02769|ALBU_BOVIN;CON__P02769	0	0	1	2		1	0	1	26.915	26.915	5	0.017314
TVMENFVAFVDKCCAADDKEACFAVEGPK	Oxidation (M);QM (E)	3429.5	sp|P02769|ALBU_BOVIN;CON__P02769	0	1	1	2		5	0	5	76.322	76.322	4	1.1034e-39
TVMENFVAFVDKCCAADDKEACFAVEGPK	QM (E)	3413.51	sp|P02769|ALBU_BOVIN;CON__P02769	0	0	1	2		3	0	3	82.611	82.611	3;4	3.5274e-46
TVMENFVAFVDKCCAADDKEACFAVEGPK	QM (T);QM (E)	3519.55	sp|P02769|ALBU_BOVIN;CON__P02769	0	0	1	2		1	0	1	88.507	88.507	4	1.6577e-39
VHKECCHGDLLECADDR	QM (E);QM (K)	2324.96	sp|P02769|ALBU_BOVIN;CON__P02769	0	0	1	1		2	0	2	23.666	23.666	4	1.0262e-05
VHKECCHGDLLECADDRADLAK	QM (E);QM (K)	2823.24	sp|P02769|ALBU_BOVIN;CON__P02769	0	0	1	2		1	0	1	30.69	30.69	5	0.013682
YNGVFQECCQAEDKGACLLPK	QM (E)	2592.14	sp|P02769|ALBU_BOVIN;CON__P02769	0	0	1	1		2	0	2	57.739	57.739	2;3	2.3068e-19

## Sheet: His
Sequence	Modifications	Mass	Proteins	Acetyl (Protein N-term)	Oxidation (M)	QM (H)	Missed cleavages	Control	KO2 Treated	Modification_Control	Modification_Treated	Retention time	Calibrated retention time	Charges	PEP
AFDEKLFTFHADICTLPDTEK	QM (H)	2603.23	sp|P02769|ALBU_BOVIN;CON__P02769	0	0	1	1		1	0	1	77.121	77.121	3	4.3983e-14
HKPKATEEQLK	QM (H)	1413.76	sp|P02769|ALBU_BOVIN;CON__P02769	0	0	1	2		2	0	2	19.003	19.003	3	0.00078439
HLVDEPQNLIK	QM (H)	1410.75	sp|P02769|ALBU_BOVIN;CON__P02769	0	0	1	0		5	0	5	45.017	45.017	2;3	3.2629e-12
HLVDEPQNLIKQNCDQFEK	QM (C);QM (H)	2509.19	sp|P02769|ALBU_BOVIN;CON__P02769	0	0	1	1		1	0	1	63.414	63.414	3	6.3305e-14
HLVDEPQNLIKQNCDQFEK	QM (H)	2460.17	sp|P02769|ALBU_BOVIN;CON__P02769	0	0	1	1		1	0	1	49.796	49.796	3	0.00064827
HPEYAVSVLLR	QM (E);QM (H)	1494.79	sp|P02769|ALBU_BOVIN;CON__P02769	0	0	1	0	1		1	0	51.397	51.397	3	0.001159
HPEYAVSVLLR	QM (H)	1388.75	sp|P02769|ALBU_BOVIN;CON__P02769	0	0	1	0		2	0	2	53.932	53.932	2	0.005444
HPEYAVSVLLR	QM (H);QM (Y)	1494.79	sp|P02769|ALBU_BOVIN;CON__P02769	0	0	1	0		1	0	1	67.432	67.432	2	0.034905
HPYFYAPELLYYANK	QM (H)	1993.96	sp|P02769|ALBU_BOVIN;CON__P02769	0	0	1	0		2	0	2	85.881	85.881	2;3	5.4116e-38
LCVLHEKTPVSEK	QM (H)	1644.85	sp|P02769|ALBU_BOVIN;CON__P02769	0	0	1	1		7	0	7	35.234	35.234	2;3;4	3.6385e-06
LCVLHEKTPVSEKVTK	QM (E);QM (H)	2079.11	sp|P02769|ALBU_BOVIN;CON__P02769	0	0	1	2		3	0	3	27.199	27.199	3;4;5	0.0012477
LCVLHEKTPVSEKVTK	QM (H)	1973.07	sp|P02769|ALBU_BOVIN;CON__P02769	0	0	1	2		1	0	1	27.163	27.163	4	5.7111e-05
LFTFHADICTLPDTEK	QM (H)	2012.96	sp|P02769|ALBU_BOVIN;CON__P02769	0	0	1	0		2	0	2	70.444	70.444	3	3.2858e-06
LFTFHADICTLPDTEKQIKK	QM (T);QM (H)	2616.33	sp|P02769|ALBU_BOVIN;CON__P02769	0	0	1	2		1	0	1	58.788	58.788	5	5.3314e-05
NECFLSHKDDSPDLPK	QM (S);QM (H)	2112.95	sp|P02769|ALBU_BOVIN;CON__P02769	0	0	1	1		3	0	3	43.628	43.628	2;3;4	3.3085e-06
NECFLSHKDDSPDLPKLKPDPNTLCDEFK	QM (S);QM (H)	3670.7	sp|P02769|ALBU_BOVIN;CON__P02769	0	0	1	3		3	0	3	63.66	63.66	4;5	3.4393e-45
SLHTLFGDELCK	QM (H)	1524.73	sp|P02769|ALBU_BOVIN;CON__P02769	0	0	1	0		1	0	1	53.867	53.867	3	1.3808e-12
SLHTLFGDELCKVASLR	QM (S);QM (H)	2157.09	sp|P02769|ALBU_BOVIN;CON__P02769	0	0	1	1		1	0	1	77.694	77.694	4	4.0534e-09
TCVADESHAGCEKSLHTLFGDELCK	QM (C);QM (H)	3018.32	sp|P02769|ALBU_BOVIN;CON__P02769	0	0	1	1		1	0	1	61.091	61.091	4	7.674e-05
VHKECCHGDLLECADDR	QM (H)	2218.92	sp|P02769|ALBU_BOVIN;CON__P02769	0	0	1	1		4	0	4	21.305	21.305	3;4	1.0829e-07
VHKECCHGDLLECADDR	QM (H);QM (K)	2324.96	sp|P02769|ALBU_BOVIN;CON__P02769	0	0	1	1		3	0	3	24.158	24.158	3;4	5.5072e-06
VHKECCHGDLLECADDRADLAK	QM (H)	2717.2	sp|P02769|ALBU_BOVIN;CON__P02769	0	0	1	2		9	0	9	24.698	24.698	3;4;5	1.3714e-18

## Sheet: Lys
Sequence	Modifications	Mass	Proteins	Acetyl (Protein N-term)	Oxidation (M)	QM (K)	Missed cleavages	Control	KO2 Treated	Modification_Control	Modification_Treated	Retention time	Calibrated retention time	Charges	PEP
ADLAKYICDNQDTISSK	QM (K)	2046.96	sp|P02769|ALBU_BOVIN;CON__P02769	0	0	1	1		2	0	2	49.658	49.658	2	4.5082e-14
ADLAKYICDNQDTISSKLK	QM (D);QM (K)	2394.18	sp|P02769|ALBU_BOVIN;CON__P02769	0	0	1	2		1	0	1	60.758	60.758	3	9.1043e-15
ADLAKYICDNQDTISSKLK	QM (K);QM (Y)	2394.18	sp|P02769|ALBU_BOVIN;CON__P02769	0	0	1	2		1	0	1	60.79	60.79	2	1.8066e-09
AEFVEVTKLVTDLTK	QM (T);QM (K)	1904.02	sp|P02769|ALBU_BOVIN;CON__P02769	0	0	1	1		1	0	1	88.138	88.138	2	8.1019e-07
AEFVEVTKLVTDLTKVHK	QM (T);QM (K)	2268.24	sp|P02769|ALBU_BOVIN;CON__P02769	0	0	1	2		1	0	1	76.659	76.659	3	1.8859e-07
AFDEKLFTFHADICTLPDTEK	QM (E);QM (K)	2709.27	sp|P02769|ALBU_BOVIN;CON__P02769	0	0	1	1		1	0	1	80.661	80.661	3	3.8292e-17
AFDEKLFTFHADICTLPDTEK	QM (D);QM (K)	2709.27	sp|P02769|ALBU_BOVIN;CON__P02769	0	0	1	1		1	0	1	80.7	80.7	4	0.00023161
AFDEKLFTFHADICTLPDTEK	QM (K)	2603.23	sp|P02769|ALBU_BOVIN;CON__P02769	0	0	1	1		1	0	1	74.557	74.557	3	9.4453e-10
ALKAWSVAR	QM (K)	1106.62	sp|P02769|ALBU_BOVIN;CON__P02769	0	0	1	1		2	0	2	47.024	47.024	2	0.0014279
ATEEQLKTVMENFVAFVDK	QM (K)	2304.13	sp|P02769|ALBU_BOVIN;CON__P02769	0	0	1	1		1	0	1	101.29	101.29	3	1.6833e-15
ATEEQLKTVMENFVAFVDK	QM (T);QM (K)	2410.18	sp|P02769|ALBU_BOVIN;CON__P02769	0	0	1	1		1	0	1	102.17	102.17	2	4.7842e-11
ATEEQLKTVMENFVAFVDKCCAADDKEACFAVEGPK	QM (T);QM (K)	4318.96	sp|P02769|ALBU_BOVIN;CON__P02769	0	0	1	3		1	0	1	99.909	99.909	5	8.3274e-34
ATEEQLKTVMENFVAFVDKCCAADDKEACFAVEGPK	QM (D);QM (K)	4318.96	sp|P02769|ALBU_BOVIN;CON__P02769	0	0	1	3		1	0	1	99.921	99.921	4	2.9072e-25
CCAADDKEACFAVEGPK	QM (K)	2032.83	sp|P02769|ALBU_BOVIN;CON__P02769	0	0	1	1		3	0	3	35.005	35.005	2	6.4553e-22
CCTKPESER	QM (K)	1271.53	sp|P02769|ALBU_BOVIN;CON__P02769	0	0	1	1		1	0	1	18.705	18.705	3	0.030101
DAIPENLPPLTADFAEDKDVCKNYQEAK	QM (E);QM (K)	3402.6	sp|P02769|ALBU_BOVIN;CON__P02769	0	0	1	2		1	0	1	78.531	78.531	3	0.028525
DDSPDLPKLKPDPNTLCDEFK	QM (K)	2549.2	sp|P02769|ALBU_BOVIN;CON__P02769	0	0	1	2		1	0	1	68.5	68.5	3	8.4406e-13
DDSPDLPKLKPDPNTLCDEFK	QM (D);QM (K)	2655.24	sp|P02769|ALBU_BOVIN;CON__P02769	0	0	1	2		1	0	1	73.162	73.162	3	3.0195e-06
DDSPDLPKLKPDPNTLCDEFK	QM (C);QM (K)	2598.22	sp|P02769|ALBU_BOVIN;CON__P02769	0	0	1	2		1	0	1	83.651	83.651	3	0.026242
DDSPDLPKLKPDPNTLCDEFKADEK	QM (K)	2992.4	sp|P02769|ALBU_BOVIN;CON__P02769	0	0	1	3		2	0	2	62.902	62.902	3;4	1.4642e-13
EACFAVEGPKLVVSTQTALA	QM (K)	2196.11	sp|P02769|ALBU_BOVIN;CON__P02769	0	0	1	1		3	0	3	94.037	94.037	2;3	1.1513e-16
ECCDKPLLEKSHCIAEVEK	QM (K)	2450.13	sp|P02769|ALBU_BOVIN;CON__P02769	0	0	1	2		1	0	1	31.196	31.196	2	5.744e-33
ECCDKPLLEKSHCIAEVEK	QM (D);QM (K)	2556.17	sp|P02769|ALBU_BOVIN;CON__P02769	0	0	1	2		2	0	2	36.494	36.494	3;4	1.7144e-10
ECCHGDLLECADDRADLAKYICDNQDTISSK	QM (K)	3777.6	sp|P02769|ALBU_BOVIN;CON__P02769	0	0	1	2		1	0	1	65.089	65.089	4	0.02427
ETYGDMADCCEKQEPER	QM (E);QM (K)	2328.9	sp|P02769|ALBU_BOVIN;CON__P02769	0	0	1	1		2	0	2	22.205	22.205	3;4	8.3848e-05
FPKAEFVEVTK	QM (K)	1399.74	sp|P02769|ALBU_BOVIN;CON__P02769	0	0	1	1		5	0	5	42.911	42.911	2;3	3.5613e-05
FPKAEFVEVTK	QM (T);QM (K)	1505.78	sp|P02769|ALBU_BOVIN;CON__P02769	0	0	1	1		2	0	2	51.151	51.151	2;3	0.0032013
FPKAEFVEVTKLVTDLTK	QM (T);QM (K)	2276.23	sp|P02769|ALBU_BOVIN;CON__P02769	0	0	1	2		2	0	2	93.425	93.425	3;4	1.1224e-10
FWGKYLYEIAR	QM (K)	1550.79	sp|P02769|ALBU_BOVIN;CON__P02769	0	0	1	1		11	0	11	70.993	70.993	2;3	0.00048455
GACLLPKIETMR	Oxidation (M);QM (K)	1509.77	sp|P02769|ALBU_BOVIN;CON__P02769	0	1	1	1		4	0	4	40.216	40.216	2;3	0.012278
GACLLPKIETMR	QM (K)	1493.77	sp|P02769|ALBU_BOVIN;CON__P02769	0	0	1	1		2	0	2	49.244	49.244	2;3	0.010754
GACLLPKIETMR	QM (E);QM (K)	1599.82	sp|P02769|ALBU_BOVIN;CON__P02769	0	0	1	1		1	0	1	57.188	57.188	3	0.035357
GLVLIAFSQYLQQCPFDEHVK	QM (K)	2597.3	sp|P02769|ALBU_BOVIN;CON__P02769	0	0	1	0	1	1	1	1	102.37	102.37	3	5.837e-20
HKPKATEEQLKTVMENFVAFVDK	QM (D);QM (K)	2900.48	sp|P02769|ALBU_BOVIN;CON__P02769	0	0	1	3		1	0	1	82.276	82.276	5	0.0086296
HLVDEPQNLIK	QM (K)	1410.75	sp|P02769|ALBU_BOVIN;CON__P02769	0	0	1	0		1	0	1	40.352	40.352	2	0.00026454
HLVDEPQNLIKQNCDQFEK	QM (K)	2460.17	sp|P02769|ALBU_BOVIN;CON__P02769	0	0	1	1		4	0	4	48.169	48.169	2;3;4	1.2299e-14
HLVDEPQNLIKQNCDQFEK	QM (C);QM (K)	2509.19	sp|P02769|ALBU_BOVIN;CON__P02769	0	0	1	1		1	0	1	63.414	63.414	3	1.7312e-12
HLVDEPQNLIKQNCDQFEKLGEYGFQNALIVR	QM (D);QM (K)	4026.99	sp|P02769|ALBU_BOVIN;CON__P02769	0	0	1	2		1	0	1	89.139	89.139	3	6.1998e-13
HLVDEPQNLIKQNCDQFEKLGEYGFQNALIVR	QM (K);QM (Y)	4026.99	sp|P02769|ALBU_BOVIN;CON__P02769	0	0	1	2		1	0	1	89.124	89.124	5	9.4614e-18
KFWGKYLYEIAR	QM (K)	1678.89	sp|P02769|ALBU_BOVIN;CON__P02769	0	0	1	2		15	0	15	71.852	71.852	2;3;4	1.3319e-05
KFWGKYLYEIAR	2 QM (K)	1784.93	sp|P02769|ALBU_BOVIN;CON__P02769	0	0	2	2		2	0	4	61.365	61.365	2;3	0.0093427
KFWGKYLYEIAR	QM (K);QM (Y)	1784.93	sp|P02769|ALBU_BOVIN;CON__P02769	0	0	1	2		1	0	1	61.327	61.327	2	0.029972
KQTALVELLK	QM (K)	1247.75	sp|P02769|ALBU_BOVIN;CON__P02769	0	0	1	1	1	2	1	2	45.305	45.305	2;3	0.00017301
KQTALVELLKHKPK	QM (K)	1738.05	sp|P02769|ALBU_BOVIN;CON__P02769	0	0	1	3		1	0	1	26.086	26.086	4	4.2629e-06
KVPQVSTPTLVEVSR	QM (K)	1744.97	sp|P02769|ALBU_BOVIN;CON__P02769;CON__P02768-1	0	0	1	1		10	0	10	47.024	47.024	2;3	3.9625e-22
LAKEYEATLEECCAK	QM (K)	1919.86	sp|P02769|ALBU_BOVIN;CON__P02769	0	0	1	1		5	0	5	35.046	35.046	2;3	2.1808e-15
LAKEYEATLEECCAK	QM (E);QM (K)	2025.91	sp|P02769|ALBU_BOVIN;CON__P02769	0	0	1	1		1	0	1	39.912	39.912	2	4.7209e-08
LCVLHEKTPVSEK	QM (K)	1644.85	sp|P02769|ALBU_BOVIN;CON__P02769	0	0	1	1		1	0	1	23.252	23.252	3	0.021804
LCVLHEKTPVSEK	QM (E);QM (K)	1750.9	sp|P02769|ALBU_BOVIN;CON__P02769	0	0	1	1		1	0	1	29.477	29.477	3	0.006763
LFTFHADICTLPDTEKQIK	QM (K)	2382.19	sp|P02769|ALBU_BOVIN;CON__P02769	0	0	1	1		1	0	1	64.32	64.32	2	4.4987e-25
LKECCDKPLLEK	QM (K)	1637.82	sp|P02769|ALBU_BOVIN;CON__P02769	0	0	1	2		9	0	9	22.083	22.083	3;4	7.6478e-05
LKECCDKPLLEKSHCIAEVEK	QM (K)	2691.31	sp|P02769|ALBU_BOVIN;CON__P02769	0	0	1	3		6	0	6	28.348	28.348	2;3;4;5	3.6025e-41
LKECCDKPLLEKSHCIAEVEK	QM (E);QM (K)	2797.35	sp|P02769|ALBU_BOVIN;CON__P02769	0	0	1	3		6	0	6	31.338	31.338	3;4;5	3.266e-24
LKHLVDEPQNLIK	QM (K)	1651.93	sp|P02769|ALBU_BOVIN;CON__P02769	0	0	1	1		2	0	2	37.491	37.491	3;4	0.00011359
LKPDPNTLCDEFK	QM (K)	1681.8	sp|P02769|ALBU_BOVIN;CON__P02769	0	0	1	1		7	0	7	49.063	49.063	2;3	1.721e-13
LKPDPNTLCDEFK	QM (D);QM (K)	1787.84	sp|P02769|ALBU_BOVIN;CON__P02769	0	0	1	1		1	0	1	56.158	56.158	3	0.01075
LKPDPNTLCDEFK	QM (C);QM (K)	1730.82	sp|P02769|ALBU_BOVIN;CON__P02769	0	0	1	1		1	0	1	68.72	68.72	3	0.016199
LKPDPNTLCDEFKADEK	QM (K)	2125	sp|P02769|ALBU_BOVIN;CON__P02769	0	0	1	2		6	0	6	45.64	45.64	2;3;4	1.4992e-25
LKPDPNTLCDEFKADEK	QM (D);QM (K)	2231.05	sp|P02769|ALBU_BOVIN;CON__P02769	0	0	1	2		4	0	4	50.215	50.215	2;3;4	4.3396e-14
LKPDPNTLCDEFKADEK	QM (C);QM (K)	2174.02	sp|P02769|ALBU_BOVIN;CON__P02769	0	0	1	2		1	0	1	64.301	64.301	3	8.212e-05
LKPDPNTLCDEFKADEKK	QM (K)	2253.1	sp|P02769|ALBU_BOVIN;CON__P02769	0	0	1	3		8	0	8	38.223	38.223	2;3;4;5	2.4996e-34
LKPDPNTLCDEFKADEKK	QM (D);QM (K)	2359.14	sp|P02769|ALBU_BOVIN;CON__P02769	0	0	1	3		2	0	2	43.508	43.508	4	2.4919e-09
LSQKFPKAEFVEVTK	QM (K)	1856.01	sp|P02769|ALBU_BOVIN;CON__P02769	0	0	1	2		4	0	4	42.012	42.012	2;3	2.9481e-10
LSQKFPKAEFVEVTK	QM (E);QM (K)	1962.05	sp|P02769|ALBU_BOVIN;CON__P02769	0	0	1	2		1	0	1	43.926	43.926	3	0.03253
LSQKFPKAEFVEVTK	QM (T);QM (K)	1962.05	sp|P02769|ALBU_BOVIN;CON__P02769	0	0	1	2		3	0	3	43.919	43.919	2;3;4	5.8498e-08
LSQKFPKAEFVEVTK	QM (S);QM (K)	1962.05	sp|P02769|ALBU_BOVIN;CON__P02769	0	0	1	2		1	0	1	43.907	43.907	4	0.0040051
LVNELTEFAKTCVADESHAGCEK	QM (K)	2713.24	sp|P02769|ALBU_BOVIN;CON__P02769	0	0	1	1		1	0	1	61.373	61.373	2	1.133e-44
LVTDLTK	QM (K)	894.506	sp|P02769|ALBU_BOVIN;CON__P02769;CON__P02768-1	0	0	1	0		1	0	1	38.632	38.632	2	0.0095094
NECFLSHKDDSPDLPK	QM (K)	2006.9	sp|P02769|ALBU_BOVIN;CON__P02769	0	0	1	1		1	0	1	36.42	36.42	2	0.002755
NECFLSHKDDSPDLPKLKPDPNTLCDEFK	QM (K)	3564.65	sp|P02769|ALBU_BOVIN;CON__P02769	0	0	1	3		1	0	1	59.794	59.794	3	2.5621e-10
NECFLSHKDDSPDLPKLKPDPNTLCDEFK	QM (S);QM (K)	3670.7	sp|P02769|ALBU_BOVIN;CON__P02769	0	0	1	3		2	0	2	63.867	63.867	4;6	6.9639e-21
NECFLSHKDDSPDLPKLKPDPNTLCDEFK	2 QM (K)	3670.7	sp|P02769|ALBU_BOVIN;CON__P02769	0	0	2	3		1	0	2	63.854	63.854	3	9.3435e-22
NYQEAKDAFLGSFLYEYSR	QM (K)	2406.12	sp|P02769|ALBU_BOVIN;CON__P02769	0	0	1	1		5	0	5	89.732	89.732	2;3	4.452e-41
NYQEAKDAFLGSFLYEYSR	QM (D);QM (K)	2512.16	sp|P02769|ALBU_BOVIN;CON__P02769	0	0	1	1		1	0	1	94.844	94.844	2	2.6051e-18
PLLEKSHCIAEVEK	QM (K)	1757.9	sp|P02769|ALBU_BOVIN;CON__P02769	0	0	1	1		2	0	2	29.841	29.841	3;4	3.4816e-05
QEPERNECFLSHKDDSPDLPK	QM (K)	2646.2	sp|P02769|ALBU_BOVIN;CON__P02769	0	0	1	2		2	0	2	31.592	31.592	2;3	2.0966e-58
QIKKQTALVELLK	2 QM (K)	1723.03	sp|P02769|ALBU_BOVIN;CON__P02769	0	0	2	2		1	0	2	44.658	44.658	3	0.0015125
QNCDQFEKLGEYGFQNALIVR	QM (K)	2634.25	sp|P02769|ALBU_BOVIN;CON__P02769	0	0	1	1		5	0	5	82.32	82.32	2;3	2.0147e-58
QNCDQFEKLGEYGFQNALIVR	QM (E);QM (K)	2740.3	sp|P02769|ALBU_BOVIN;CON__P02769	0	0	1	1		1	0	1	84.717	84.717	3	1.0508e-17
QTALVELLK	QM (K)	1119.65	sp|P02769|ALBU_BOVIN;CON__P02769	0	0	1	0		1	0	1	68.212	68.212	2	2.5723e-13
QTALVELLKHKPK	QM (K)	1609.96	sp|P02769|ALBU_BOVIN;CON__P02769	0	0	1	2		1	0	1	32.155	32.155	2	6.7737e-13
RPCFSALTPDETYVPKAFDEK	QM (K)	2576.23	sp|P02769|ALBU_BOVIN;CON__P02769	0	0	1	2		2	0	2	60.615	60.615	2;3	4.9618e-17
RPCFSALTPDETYVPKAFDEKLFTFHADICTLPDTEK	QM (E);QM (K)	4571.17	sp|P02769|ALBU_BOVIN;CON__P02769	0	0	1	3		1	0	1	89.26	89.26	6	0.0030543
SHCIAEVEKDAIPENLPPLTADFAEDK	QM (T);2 QM (D);QM (E);QM (K)	3538.65	sp|P02769|ALBU_BOVIN;CON__P02769	0	0	1	1	1	1	1	1	77.784	77.784	4	2.5147e-05
SHCIAEVEKDAIPENLPPLTADFAEDK	QM (K)	3114.49	sp|P02769|ALBU_BOVIN;CON__P02769	0	0	1	1		1	0	1	76.93	76.93	4	6.691e-15
SHCIAEVEKDAIPENLPPLTADFAEDKDVCK	QM (D);QM (K)	3722.75	sp|P02769|ALBU_BOVIN;CON__P02769	0	0	1	2		3	0	3	75.325	75.325	3;4	9.3641e-16
SHCIAEVEKDAIPENLPPLTADFAEDKDVCK	QM (E);QM (K)	3722.75	sp|P02769|ALBU_BOVIN;CON__P02769	0	0	1	2		1	0	1	74.959	74.959	5	2.5714e-15
SHCIAEVEKDAIPENLPPLTADFAEDKDVCKNYQEAK	QM (E);QM (K)	4456.09	sp|P02769|ALBU_BOVIN;CON__P02769	0	0	1	3		1	0	1	68.135	68.135	5	3.5297e-13
SHCIAEVEKDAIPENLPPLTADFAEDKDVCKNYQEAK	QM (D);QM (K)	4456.09	sp|P02769|ALBU_BOVIN;CON__P02769	0	0	1	3		1	0	1	69.103	69.103	4	1.4744e-26
SLHTLFGDELCK	QM (K)	1524.73	sp|P02769|ALBU_BOVIN;CON__P02769	0	0	1	0		1	0	1	62.403	62.403	3	0.00015541
SLHTLFGDELCKVASLR	QM (K)	2051.05	sp|P02769|ALBU_BOVIN;CON__P02769	0	0	1	1		1	0	1	72.581	72.581	3	9.4137e-12
SLHTLFGDELCKVASLR	QM (C);QM (K)	2100.07	sp|P02769|ALBU_BOVIN;CON__P02769	0	0	1	1		1	0	1	82.392	82.392	4	1.4054e-06
TCVADESHAGCEKSLHTLFGDELCK	QM (K)	2969.3	sp|P02769|ALBU_BOVIN;CON__P02769	0	0	1	1		2	0	2	47.445	47.445	2;4	4.6986e-37
TPVSEKVTKCCTESLVNR	QM (T);QM (K)	2319.12	sp|P02769|ALBU_BOVIN;CON__P02769	0	0	1	2		1	0	1	30.991	30.991	2	1.2944e-18
TVMENFVAFVDKCCAADDKEACFAVEGPK	QM (T);2 QM (D);QM (E);QM (K)	3837.68	sp|P02769|ALBU_BOVIN;CON__P02769	0	0	1	2		1	0	1	26.915	26.915	5	0.017314
TVMENFVAFVDKCCAADDKEACFAVEGPK	Oxidation (M);QM (K)	3429.5	sp|P02769|ALBU_BOVIN;CON__P02769	0	1	1	2		1	0	1	72.414	72.414	4	0.0067537
TVMENFVAFVDKCCAADDKEACFAVEGPK	QM (D);QM (K)	3519.55	sp|P02769|ALBU_BOVIN;CON__P02769	0	0	1	2		1	0	1	88.503	88.503	3	9.6849e-40
VHKECCHGDLLECADDR	QM (K)	2218.92	sp|P02769|ALBU_BOVIN;CON__P02769	0	0	1	1		3	0	3	22.122	22.122	3;4	1.1669e-05
VHKECCHGDLLECADDR	QM (E);QM (K)	2324.96	sp|P02769|ALBU_BOVIN;CON__P02769	0	0	1	1		2	0	2	23.666	23.666	4	1.0262e-05
VHKECCHGDLLECADDR	QM (H);QM (K)	2324.96	sp|P02769|ALBU_BOVIN;CON__P02769	0	0	1	1		3	0	3	24.158	24.158	3;4	5.5072e-06
VHKECCHGDLLECADDRADLAK	QM (K)	2717.2	sp|P02769|ALBU_BOVIN;CON__P02769	0	0	1	2		1	0	1	23.428	23.428	5	0.00023433
VHKECCHGDLLECADDRADLAK	QM (E);QM (K)	2823.24	sp|P02769|ALBU_BOVIN;CON__P02769	0	0	1	2		1	0	1	30.69	30.69	5	0.013682
VTKCCTESLVNR	QM (K)	1571.74	sp|P02769|ALBU_BOVIN;CON__P02769;CON__P02768-1	0	0	1	1		1	0	1	20.518	20.518	3	1.2718e-05
VTKCCTESLVNR	QM (T);QM (K)	1677.79	sp|P02769|ALBU_BOVIN;CON__P02769;CON__P02768-1	0	0	1	1		2	0	2	27.014	27.014	2;3	5.8444e-05
VTKCCTESLVNR	QM (C);QM (K)	1620.76	sp|P02769|ALBU_BOVIN;CON__P02769;CON__P02768-1	0	0	1	1		1	0	1	31.865	31.865	3	0.0011977

## Sheet: Arg
Sequence	Modifications	Mass	Proteins	Acetyl (Protein N-term)	Oxidation (M)	QM (R)	Missed cleavages	Control	KO2 Treated	Modification_Control	Modification_Treated	Retention time	Calibrated retention time	Charges	PEP
LGEYGFQNALIVRYTR	QM (R)	2005.04	sp|P02769|ALBU_BOVIN;CON__P02769	0	0	1	1		1	0	1	70.919	70.919	3	0.0014879
RHPEYAVSVLLR	QM (R)	1544.85	sp|P02769|ALBU_BOVIN;CON__P02769	0	0	1	1	2	7	2	7	40.825	40.825	2;3	1.4987e-18
RPCFSALTPDETYVPK	QM (R)	1985.96	sp|P02769|ALBU_BOVIN;CON__P02769	0	0	1	1		1	0	1	55.534	55.534	3	0.0020794
RPCFSALTPDETYVPKAFDEKLFTFHADICTLPDTEK	QM (S);QM (R)	4571.17	sp|P02769|ALBU_BOVIN;CON__P02769	0	0	1	3		2	0	2	89.246	89.246	5;6	9.8004e-49

## Sheet: Ser
Sequence	Modifications	Mass	Proteins	Acetyl (Protein N-term)	Oxidation (M)	QM (S)	Missed cleavages	Control	KO2 Treated	Modification_Control	Modification_Treated	Retention time	Calibrated retention time	Charges	PEP
CCAADDKEACFAVEGPKLVVSTQTALA	QM (S)	3016.4	sp|P02769|ALBU_BOVIN;CON__P02769	0	0	1	2		1	0	1	76.386	76.386	3	0.00027695
DDPHACYSTVFDKLKHLVDEPQNLIK	QM (S);QM (Y)	3293.61	sp|P02769|ALBU_BOVIN;CON__P02769	0	0	1	2		2	0	2	94.275	94.275	4;5	2.9147e-31
DDSPDLPKLKPDPNTLCDEFK	QM (S)	2549.2	sp|P02769|ALBU_BOVIN;CON__P02769	0	0	1	2		1	0	1	68.5	68.5	3	1.7331e-20
DDSPDLPKLKPDPNTLCDEFKADEK	QM (S)	2992.4	sp|P02769|ALBU_BOVIN;CON__P02769	0	0	1	3		1	0	1	62.897	62.897	4	2.2381e-30
EACFAVEGPKLVVSTQTALA	QM (S)	2196.11	sp|P02769|ALBU_BOVIN;CON__P02769	0	0	1	1		2	0	2	85.46	85.46	2;3	7.5206e-06
GLVLIAFSQYLQQCPFDEHVKLVNELTEFAK	QM (S)	3741.91	sp|P02769|ALBU_BOVIN;CON__P02769	0	0	1	1		1	0	1	102.88	102.88	4	7.7773e-76
LCVLHEKTPVSEK	QM (S)	1644.85	sp|P02769|ALBU_BOVIN;CON__P02769	0	0	1	1		1	0	1	23.252	23.252	3	0.0080928
LSQKFPKAEFVEVTK	QM (S)	1856.01	sp|P02769|ALBU_BOVIN;CON__P02769	0	0	1	2		2	0	2	41.056	41.056	3;4	0.00023396
LSQKFPKAEFVEVTK	QM (S);QM (K)	1962.05	sp|P02769|ALBU_BOVIN;CON__P02769	0	0	1	2		1	0	1	43.907	43.907	4	0.0040051
NECFLSHKDDSPDLPK	QM (S)	2006.9	sp|P02769|ALBU_BOVIN;CON__P02769	0	0	1	1		1	0	1	35.815	35.815	2	4.07e-06
NECFLSHKDDSPDLPK	QM (S);QM (H)	2112.95	sp|P02769|ALBU_BOVIN;CON__P02769	0	0	1	1		3	0	3	43.628	43.628	2;3;4	3.3085e-06
NECFLSHKDDSPDLPK	QM (S);QM (E)	2112.95	sp|P02769|ALBU_BOVIN;CON__P02769	0	0	1	1		1	0	1	43.631	43.631	3	0.032154
NECFLSHKDDSPDLPKLKPDPNTLCDEFK	QM (S)	3564.65	sp|P02769|ALBU_BOVIN;CON__P02769	0	0	1	3		2	0	2	59.797	59.797	4;6	0.013403
NECFLSHKDDSPDLPKLKPDPNTLCDEFK	QM (S);QM (H)	3670.7	sp|P02769|ALBU_BOVIN;CON__P02769	0	0	1	3		3	0	3	63.66	63.66	4;5	3.4393e-45
NECFLSHKDDSPDLPKLKPDPNTLCDEFK	QM (S);QM (K)	3670.7	sp|P02769|ALBU_BOVIN;CON__P02769	0	0	1	3		2	0	2	63.867	63.867	4;6	6.9639e-21
NECFLSHKDDSPDLPKLKPDPNTLCDEFK	QM (S);QM (D)	3670.7	sp|P02769|ALBU_BOVIN;CON__P02769	0	0	1	3		1	0	1	63.854	63.854	3	5.5069e-11
NYQEAKDAFLGSFLYEYSR	QM (S)	2406.12	sp|P02769|ALBU_BOVIN;CON__P02769	0	0	1	1		2	0	2	90.503	90.503	3	0.00038657
PCFSALTPDETYVPK	QM (S);QM (T)	1935.9	sp|P02769|ALBU_BOVIN;CON__P02769	0	0	1	0		1	0	1	54.794	54.794	2	9.8074e-05
PCFSALTPDETYVPK	QM (S);QM (T);QM (D);QM (Y)	2147.98	sp|P02769|ALBU_BOVIN;CON__P02769	0	0	1	0		1	0	1	104.56	104.56	2	0.035712
QEPERNECFLSHKDDSPDLPK	QM (S)	2646.2	sp|P02769|ALBU_BOVIN;CON__P02769	0	0	1	2		1	0	1	31.592	31.592	3	2.6788e-06
RPCFSALTPDETYVPK	QM (S)	1985.96	sp|P02769|ALBU_BOVIN;CON__P02769	0	0	1	1		3	0	3	60.886	60.886	2;3	4.8136e-06
RPCFSALTPDETYVPKAFDEKLFTFHADICTLPDTEK	QM (S);QM (R)	4571.17	sp|P02769|ALBU_BOVIN;CON__P02769	0	0	1	3		2	0	2	89.246	89.246	5;6	9.8004e-49
SHCIAEVEK	QM (C);QM (S)	1226.56	sp|P02769|ALBU_BOVIN;CON__P02769	0	0	1	0		1	0	1	31.906	31.906	2	0.0084833
SLHTLFGDELCK	QM (S)	1524.73	sp|P02769|ALBU_BOVIN;CON__P02769	0	0	1	0		1	0	1	53.909	53.909	2	1.2243e-35
SLHTLFGDELCKVASLR	QM (S)	2051.05	sp|P02769|ALBU_BOVIN;CON__P02769	0	0	1	1		11	0	11	74.27	74.27	2;3;4	2.9622e-31
SLHTLFGDELCKVASLR	QM (S);QM (H)	2157.09	sp|P02769|ALBU_BOVIN;CON__P02769	0	0	1	1		1	0	1	77.694	77.694	4	4.0534e-09
TPVSEKVTKCCTESLVNR	QM (S);QM (E)	2319.12	sp|P02769|ALBU_BOVIN;CON__P02769	0	0	1	2		1	0	1	31.008	31.008	4	1.1181e-10
VPQVSTPTLVEVSR	QM (S)	1616.88	sp|P02769|ALBU_BOVIN;CON__P02769;CON__P02768-1	0	0	1	0		1	0	1	63.064	63.064	2	0.027918

## Sheet: Thr
Sequence	Modifications	Mass	Proteins	Acetyl (Protein N-term)	Oxidation (M)	QM (T)	Missed cleavages	Control	KO2 Treated	Modification_Control	Modification_Treated	Retention time	Calibrated retention time	Charges	PEP
AEFVEVTKLVTDLTK	QM (T);QM (E)	1904.02	sp|P02769|ALBU_BOVIN;CON__P02769	0	0	1	1		1	0	1	88.138	88.138	2	0.00028583
AEFVEVTKLVTDLTK	QM (T);QM (K)	1904.02	sp|P02769|ALBU_BOVIN;CON__P02769	0	0	1	1		1	0	1	88.138	88.138	2	8.1019e-07
AEFVEVTKLVTDLTKVHK	QM (T);QM (E)	2268.24	sp|P02769|ALBU_BOVIN;CON__P02769	0	0	1	2		1	0	1	76.674	76.674	4	1.3553e-10
AEFVEVTKLVTDLTKVHK	QM (T);QM (K)	2268.24	sp|P02769|ALBU_BOVIN;CON__P02769	0	0	1	2		1	0	1	76.659	76.659	3	1.8859e-07
AFDEKLFTFHADICTLPDTEK	QM (T)	2603.23	sp|P02769|ALBU_BOVIN;CON__P02769	0	0	1	1		4	0	4	78.476	78.476	3;4	3.97e-14
AFDEKLFTFHADICTLPDTEK	QM (T);QM (D)	2709.27	sp|P02769|ALBU_BOVIN;CON__P02769	0	0	1	1		1	0	1	80.7	80.7	4	5.3977e-12
AFDEKLFTFHADICTLPDTEKQIK	QM (T);QM (E)	3078.5	sp|P02769|ALBU_BOVIN;CON__P02769	0	0	1	2		3	0	3	74.308	74.308	3;4;5	3.4374e-31
ATEEQLKTVMENFVAFVDK	Oxidation (M);QM (T)	2320.13	sp|P02769|ALBU_BOVIN;CON__P02769	0	1	1	1		5	0	5	84.427	84.427	3	8.0959e-15
ATEEQLKTVMENFVAFVDK	QM (T)	2304.13	sp|P02769|ALBU_BOVIN;CON__P02769	0	0	1	1		3	0	3	101.43	101.43	3;4	6.8529e-12
ATEEQLKTVMENFVAFVDK	QM (T);QM (E)	2410.18	sp|P02769|ALBU_BOVIN;CON__P02769	0	0	1	1		1	0	1	102.17	102.17	3	1.6569e-11
ATEEQLKTVMENFVAFVDK	QM (T);QM (K)	2410.18	sp|P02769|ALBU_BOVIN;CON__P02769	0	0	1	1		1	0	1	102.17	102.17	2	4.7842e-11
ATEEQLKTVMENFVAFVDKCCAADDKEACFAVEGPK	QM (T);QM (K)	4318.96	sp|P02769|ALBU_BOVIN;CON__P02769	0	0	1	3		1	0	1	99.909	99.909	5	8.3274e-34
CCAADDKEACFAVEGPKLVVSTQTALA	QM (T)	3016.4	sp|P02769|ALBU_BOVIN;CON__P02769	0	0	1	2		1	0	1	76.386	76.386	3	8.3295e-22
DAIPENLPPLTADFAEDKDVCKNYQEAK	QM (T);QM (D)	3402.6	sp|P02769|ALBU_BOVIN;CON__P02769	0	0	1	2		1	0	1	78.531	78.531	3	0.008411
DAIPENLPPLTADFAEDKDVCKNYQEAKDAFLGSFLYEYSR	QM (T);QM (D)	4951.32	sp|P02769|ALBU_BOVIN;CON__P02769	0	0	1	3		1	0	1	101.44	101.44	4	4.7278e-07
EACFAVEGPKLVVSTQTALA	QM (T)	2196.11	sp|P02769|ALBU_BOVIN;CON__P02769	0	0	1	1		3	0	3	93.45	93.45	2	4.8665e-24
ETYGDMADCCEKQEPERNECFLSHK	Oxidation (M);QM (T)	3254.3	sp|P02769|ALBU_BOVIN;CON__P02769	0	1	1	2		1	0	1	26.698	26.698	3	1.501e-30
ETYGDMADCCEKQEPERNECFLSHK	QM (T)	3238.31	sp|P02769|ALBU_BOVIN;CON__P02769	0	0	1	2		1	0	1	33.21	33.21	3	0.034884
ETYGDMADCCEKQEPERNECFLSHKDDSPDLPK	Oxidation (M);QM (T)	4121.7	sp|P02769|ALBU_BOVIN;CON__P02769	0	1	1	3		1	0	1	35.109	35.109	4	4.0195e-11
EYEATLEECCAKDDPHACYSTVFDK	QM (T)	3143.28	sp|P02769|ALBU_BOVIN;CON__P02769	0	0	1	1		2	0	2	51.965	51.965	3;4	1.7427e-31
EYEATLEECCAKDDPHACYSTVFDK	QM (T);QM (E)	3249.33	sp|P02769|ALBU_BOVIN;CON__P02769	0	0	1	1		1	0	1	57.612	57.612	3	0.00011759
FPKAEFVEVTK	QM (T)	1399.74	sp|P02769|ALBU_BOVIN;CON__P02769	0	0	1	1		1	0	1	42.91	42.91	3	0.010082
FPKAEFVEVTK	QM (T);QM (K)	1505.78	sp|P02769|ALBU_BOVIN;CON__P02769	0	0	1	1		2	0	2	51.151	51.151	2;3	0.0032013
FPKAEFVEVTKLVTDLTK	QM (T);QM (K)	2276.23	sp|P02769|ALBU_BOVIN;CON__P02769	0	0	1	2		2	0	2	93.425	93.425	3;4	1.1224e-10
FPKAEFVEVTKLVTDLTK	QM (T);QM (D)	2276.23	sp|P02769|ALBU_BOVIN;CON__P02769	0	0	1	2		2	0	2	93.425	93.425	3;4	4.1293e-12
FPKAEFVEVTKLVTDLTK	QM (T)	2170.19	sp|P02769|ALBU_BOVIN;CON__P02769	0	0	1	2		1	0	1	93.472	93.472	3	1.0464e-10
LAKEYEATLEECCAKDDPHACYSTVFDK	QM (T);QM (E)	3561.54	sp|P02769|ALBU_BOVIN;CON__P02769	0	0	1	2		1	0	1	52.854	52.854	3	0.015651
LFTFHADICTLPDTEK	QM (T)	2012.96	sp|P02769|ALBU_BOVIN;CON__P02769	0	0	1	0		3	0	3	71.216	71.216	3	1.821e-11
LFTFHADICTLPDTEKQIK	QM (T)	2382.19	sp|P02769|ALBU_BOVIN;CON__P02769	0	0	1	1		6	0	6	69.61	69.61	3;4	5.762e-11
LFTFHADICTLPDTEKQIK	QM (T);QM (E)	2488.23	sp|P02769|ALBU_BOVIN;CON__P02769	0	0	1	1		1	0	1	81.509	81.509	4	0.00014018
LFTFHADICTLPDTEKQIKK	QM (T)	2510.29	sp|P02769|ALBU_BOVIN;CON__P02769	0	0	1	2		1	0	1	58.788	58.788	4	0.0018296
LFTFHADICTLPDTEKQIKK	QM (T);QM (E)	2616.33	sp|P02769|ALBU_BOVIN;CON__P02769	0	0	1	2		2	0	2	58.758	58.758	3;4	0.00057635
LFTFHADICTLPDTEKQIKK	QM (T);QM (H)	2616.33	sp|P02769|ALBU_BOVIN;CON__P02769	0	0	1	2		1	0	1	58.788	58.788	5	5.3314e-05
LGEYGFQNALIVRYTRKVPQVSTPTLVEVSR	QM (T)	3625.96	sp|P02769|ALBU_BOVIN;CON__P02769	0	0	1	3		1	0	1	76.756	76.756	5	0.0063986
LKPDPNTLCDEFKADEK	QM (T)	2125	sp|P02769|ALBU_BOVIN;CON__P02769	0	0	1	2		2	0	2	53.186	53.186	2;3	0.00099718
LKPDPNTLCDEFKADEKK	QM (T)	2253.1	sp|P02769|ALBU_BOVIN;CON__P02769	0	0	1	3		1	0	1	37.453	37.453	2	1.9105e-10
LSQKFPKAEFVEVTK	QM (T);QM (K)	1962.05	sp|P02769|ALBU_BOVIN;CON__P02769	0	0	1	2		3	0	3	43.919	43.919	2;3;4	5.8498e-08
LSQKFPKAEFVEVTK	QM (T)	1856.01	sp|P02769|ALBU_BOVIN;CON__P02769	0	0	1	2		1	0	1	43.919	43.919	2	1.2037e-07
LVNELTEFAKTCVADESHAGCEK	QM (T);QM (E)	2819.28	sp|P02769|ALBU_BOVIN;CON__P02769	0	0	1	1		1	0	1	66.488	66.488	3	4.0523e-10
LVTDLTKVHK	QM (T)	1258.73	sp|P02769|ALBU_BOVIN;CON__P02769	0	0	1	1		1	0	1	24.415	24.415	3	0.00061567
LVTDLTKVHKECCHGDLLECADDR	QM (T);QM (D)	3095.42	sp|P02769|ALBU_BOVIN;CON__P02769	0	0	1	2		3	0	3	43.885	43.885	3;4;5	1.6583e-21
LVVSTQTALA	QM (T)	1107.62	sp|P02769|ALBU_BOVIN;CON__P02769	0	0	1	0		1	0	1	68.356	68.356	2	0.00081351
MPCTEDYLSLILNR	Oxidation (M);QM (T)	1845.86	sp|P02769|ALBU_BOVIN;CON__P02769	0	1	1	0		2	0	2	96.965	96.965	2	2.4307e-06
MPCTEDYLSLILNR	QM (T)	1829.87	sp|P02769|ALBU_BOVIN;CON__P02769	0	0	1	0		1	0	1	100.47	100.47	2	3.2781e-09
PCFSALTPDETYVPK	QM (T);QM (E)	1935.9	sp|P02769|ALBU_BOVIN;CON__P02769	0	0	1	0	1		1	0	55.336	55.336	2	0.034026
PCFSALTPDETYVPK	QM (S);QM (T)	1935.9	sp|P02769|ALBU_BOVIN;CON__P02769	0	0	1	0		1	0	1	54.794	54.794	2	9.8074e-05
PCFSALTPDETYVPK	2 QM (T)	1935.9	sp|P02769|ALBU_BOVIN;CON__P02769	0	0	2	0		1	0	2	55.52	55.52	2	0.0258
PCFSALTPDETYVPK	QM (S);QM (T);QM (D);QM (Y)	2147.98	sp|P02769|ALBU_BOVIN;CON__P02769	0	0	1	0		1	0	1	104.56	104.56	2	0.035712
PCFSALTPDETYVPKAFDEK	QM (T)	2420.12	sp|P02769|ALBU_BOVIN;CON__P02769	0	0	1	1		1	0	1	72.624	72.624	3	1.4934e-09
QTALVELLKHKPK	QM (T)	1609.96	sp|P02769|ALBU_BOVIN;CON__P02769	0	0	1	2		2	0	2	32.156	32.156	3;4	3.8973e-05
RPCFSALTPDETYVPK	QM (T)	1985.96	sp|P02769|ALBU_BOVIN;CON__P02769	0	0	1	1		1	0	1	55.495	55.495	2	2.3577e-08
RPCFSALTPDETYVPKAFDEK	QM (T)	2576.23	sp|P02769|ALBU_BOVIN;CON__P02769	0	0	1	2		3	0	3	60.602	60.602	4	1.6645e-08
RPCFSALTPDETYVPKAFDEKLFTFHADICTLPDTEK	QM (T);QM (Y)	4571.17	sp|P02769|ALBU_BOVIN;CON__P02769	0	0	1	3		1	0	1	89.232	89.232	5	4.1726e-13
SHCIAEVEKDAIPENLPPLTADFAEDK	QM (T);2 QM (D);QM (E);QM (K)	3538.65	sp|P02769|ALBU_BOVIN;CON__P02769	0	0	1	1	1	1	1	1	77.784	77.784	4	2.5147e-05
SHCIAEVEKDAIPENLPPLTADFAEDKDVCK	QM (T);QM (E)	3722.75	sp|P02769|ALBU_BOVIN;CON__P02769	0	0	1	2		1	0	1	73.561	73.561	4	3.3555e-07
SHCIAEVEKDAIPENLPPLTADFAEDKDVCK	QM (T);QM (D)	3722.75	sp|P02769|ALBU_BOVIN;CON__P02769	0	0	1	2		1	0	1	74.962	74.962	3	5.7816e-16
SHCIAEVEKDAIPENLPPLTADFAEDKDVCKNYQEAK	QM (T)	4350.05	sp|P02769|ALBU_BOVIN;CON__P02769	0	0	1	3		1	0	1	65.423	65.423	5	5.7523e-19
SLHTLFGDELCK	QM (T)	1524.73	sp|P02769|ALBU_BOVIN;CON__P02769	0	0	1	0		1	0	1	58.178	58.178	3	0.00059977
SLHTLFGDELCKVASLR	QM (T)	2051.05	sp|P02769|ALBU_BOVIN;CON__P02769	0	0	1	1		1	0	1	72.599	72.599	4	4.1744e-08
TCVADESHAGCEKSLHTLFGDELCK	QM (T)	2969.3	sp|P02769|ALBU_BOVIN;CON__P02769	0	0	1	1		3	0	3	47.44	47.44	3;4;5	2.1834e-30
TPVSEKVTKCCTESLVNR	QM (T);QM (E)	2319.12	sp|P02769|ALBU_BOVIN;CON__P02769	0	0	1	2		1	0	1	31.006	31.006	3	1.3748e-11
TPVSEKVTKCCTESLVNR	QM (T);QM (K)	2319.12	sp|P02769|ALBU_BOVIN;CON__P02769	0	0	1	2		1	0	1	30.991	30.991	2	1.2944e-18
TPVSEKVTKCCTESLVNR	QM (T)	2213.08	sp|P02769|ALBU_BOVIN;CON__P02769	0	0	1	2		3	0	3	28.566	28.566	3;4	8.4082e-15
TVMENFVAFVDKCCAADDK	Oxidation (M);QM (T)	2341.01	sp|P02769|ALBU_BOVIN;CON__P02769	0	1	1	1		1	0	1	65.031	65.031	3	1.4402e-12
TVMENFVAFVDKCCAADDK	QM (T)	2325.01	sp|P02769|ALBU_BOVIN;CON__P02769	0	0	1	1		1	0	1	82.673	82.673	3	1.7033e-12
TVMENFVAFVDKCCAADDKEACFAVEGPK	QM (T);2 QM (D);QM (E);QM (K)	3837.68	sp|P02769|ALBU_BOVIN;CON__P02769	0	0	1	2		1	0	1	26.915	26.915	5	0.017314
TVMENFVAFVDKCCAADDKEACFAVEGPK	Oxidation (M);QM (T)	3429.5	sp|P02769|ALBU_BOVIN;CON__P02769	0	1	1	2		4	0	4	74.468	74.468	4	1.8546e-38
TVMENFVAFVDKCCAADDKEACFAVEGPK	QM (T)	3413.51	sp|P02769|ALBU_BOVIN;CON__P02769	0	0	1	2		4	0	4	86.009	86.009	3;4	5.104e-75
TVMENFVAFVDKCCAADDKEACFAVEGPK	QM (T);QM (E)	3519.55	sp|P02769|ALBU_BOVIN;CON__P02769	0	0	1	2		1	0	1	88.507	88.507	4	1.6577e-39
VTKCCTESLVNR	QM (T)	1571.74	sp|P02769|ALBU_BOVIN;CON__P02769;CON__P02768-1	0	0	1	1		3	0	3	20.619	20.619	2;3	9.8838e-06
VTKCCTESLVNR	QM (T);QM (K)	1677.79	sp|P02769|ALBU_BOVIN;CON__P02769;CON__P02768-1	0	0	1	1		2	0	2	27.014	27.014	2;3	5.8444e-05
VTKCCTESLVNR	QM (C);QM (T)	1620.76	sp|P02769|ALBU_BOVIN;CON__P02769;CON__P02768-1	0	0	1	1		1	0	1	31.972	31.972	2	0.002696

## Sheet: Tyr
Sequence	Modifications	Mass	Proteins	Acetyl (Protein N-term)	Oxidation (M)	QM (Y)	Missed cleavages	Control	KO2 Treated	Modification_Control	Modification_Treated	Retention time	Calibrated retention time	Charges	PEP
ADLAKYICDNQDTISSKLK	QM (K);QM (Y)	2394.18	sp|P02769|ALBU_BOVIN;CON__P02769	0	0	1	2		1	0	1	60.79	60.79	2	1.8066e-09
DAFLGSFLYEYSR	QM (Y)	1672.78	sp|P02769|ALBU_BOVIN;CON__P02769	0	0	1	0		1	0	1	103.22	103.22	2	8.9904e-13
DAFLGSFLYEYSRR	QM (Y)	1828.88	sp|P02769|ALBU_BOVIN;CON__P02769	0	0	1	1		1	0	1	88.608	88.608	3	0.0002533
DDPHACYSTVFDKLKHLVDEPQNLIK	QM (S);QM (Y)	3293.61	sp|P02769|ALBU_BOVIN;CON__P02769	0	0	1	2		2	0	2	94.275	94.275	4;5	2.9147e-31
DLGEEHFKGLVLIAFSQYLQQCPFDEHVK	QM (Y)	3552.74	sp|P02769|ALBU_BOVIN;CON__P02769	0	0	1	1		2	0	2	101.48	101.48	3;4	1.841e-39
ECCHGDLLECADDRADLAKYICDNQDTISSK	QM (Y)	3777.6	sp|P02769|ALBU_BOVIN;CON__P02769	0	0	1	2		1	0	1	65.089	65.089	4	1.7081e-22
ETYGDMADCCEK	Oxidation (M);QM (Y)	1599.55	sp|P02769|ALBU_BOVIN;CON__P02769	0	1	1	0		1	0	1	29.277	29.277	2	0.0227
ETYGDMADCCEKQEPER	Oxidation (M);QM (Y)	2238.85	sp|P02769|ALBU_BOVIN;CON__P02769	0	1	1	1		8	0	8	22.671	22.671	2;3	2.8851e-14
ETYGDMADCCEKQEPER	QM (Y)	2222.86	sp|P02769|ALBU_BOVIN;CON__P02769	0	0	1	1		1	0	1	26.25	26.25	3	3.0558e-15
EYEATLEECCAKDDPHACYSTVFDKLK	QM (E);QM (Y)	3490.5	sp|P02769|ALBU_BOVIN;CON__P02769	0	0	1	2		2	0	2	61.565	61.565	4;5	2.8493e-20
FKDLGEEHFKGLVLIAFSQYLQQCPFDEHVK	QM (Y)	3827.9	sp|P02769|ALBU_BOVIN;CON__P02769	0	0	1	2		2	0	2	98.518	98.518	5;6	4.5731e-39
FKDLGEEHFKGLVLIAFSQYLQQCPFDEHVK	QM (C);QM (Y)	3876.92	sp|P02769|ALBU_BOVIN;CON__P02769	0	0	1	2		3	0	3	100.86	100.86	4;5;6	8.0842e-31
FWGKYLYEIAR	QM (Y)	1550.79	sp|P02769|ALBU_BOVIN;CON__P02769	0	0	1	1		1	0	1	68.064	68.064	2	0.0011125
GLVLIAFSQYLQQCPFDEHVK	QM (Y)	2597.3	sp|P02769|ALBU_BOVIN;CON__P02769	0	0	1	0	1		1	0	103.23	103.23	3	0.035172
HLVDEPQNLIKQNCDQFEKLGEYGFQNALIVR	QM (E);QM (Y)	4026.99	sp|P02769|ALBU_BOVIN;CON__P02769	0	0	1	2		1	0	1	89.124	89.124	5	2.8557e-42
HLVDEPQNLIKQNCDQFEKLGEYGFQNALIVR	QM (K);QM (Y)	4026.99	sp|P02769|ALBU_BOVIN;CON__P02769	0	0	1	2		1	0	1	89.124	89.124	5	9.4614e-18
HPEYAVSVLLR	QM (H);QM (Y)	1494.79	sp|P02769|ALBU_BOVIN;CON__P02769	0	0	1	0		1	0	1	67.432	67.432	2	0.034905
HPYFYAPELLYYANK	QM (Y)	1993.96	sp|P02769|ALBU_BOVIN;CON__P02769	0	0	1	0		7	0	7	82.545	82.545	2;3	1.7697e-10
KFWGKYLYEIAR	QM (Y)	1678.89	sp|P02769|ALBU_BOVIN;CON__P02769	0	0	1	2		3	0	3	55.289	55.289	2;3;4	0.00055348
KFWGKYLYEIAR	QM (K);QM (Y)	1784.93	sp|P02769|ALBU_BOVIN;CON__P02769	0	0	1	2		1	0	1	61.327	61.327	2	0.029972
LAKEYEATLEECCAK	QM (Y)	1919.86	sp|P02769|ALBU_BOVIN;CON__P02769	0	0	1	1		3	0	3	36.288	36.288	2;3	1.0424e-07
LGEYGFQNALIVR	QM (Y)	1584.83	sp|P02769|ALBU_BOVIN;CON__P02769	0	0	1	0		2	0	2	80.545	80.545	2	5.7301e-91
MPCTEDYLSLILNR	Oxidation (M);QM (Y)	1845.86	sp|P02769|ALBU_BOVIN;CON__P02769	0	1	1	0		2	0	2	99.395	99.395	2	2.4135e-48
MPCTEDYLSLILNR	QM (Y)	1829.87	sp|P02769|ALBU_BOVIN;CON__P02769	0	0	1	0		2	0	2	102.3	102.3	2;3	1.0929e-109
NYQEAKDAFLGSFLYEYSR	QM (Y)	2406.12	sp|P02769|ALBU_BOVIN;CON__P02769	0	0	1	1		5	0	5	87.399	87.399	3	4.2855e-25
PCFSALTPDETYVPK	QM (S);QM (T);QM (D);QM (Y)	2147.98	sp|P02769|ALBU_BOVIN;CON__P02769	0	0	1	0		1	0	1	104.56	104.56	2	0.035712
QNCDQFEKLGEYGFQNALIVR	QM (Y)	2634.25	sp|P02769|ALBU_BOVIN;CON__P02769	0	0	1	1		1	0	1	81.206	81.206	4	8.5223e-58
RHPEYAVSVLLR	QM (Y)	1544.85	sp|P02769|ALBU_BOVIN;CON__P02769	0	0	1	1		2	0	2	48.142	48.142	2;3	6.9243e-27
RHPEYAVSVLLRLAKEYEATLEECCAK	QM (E);QM (Y)	3446.7	sp|P02769|ALBU_BOVIN;CON__P02769	0	0	1	3		1	0	1	96.819	96.819	5	6.9204e-06
RHPYFYAPELLYYANK	QM (Y)	2150.06	sp|P02769|ALBU_BOVIN;CON__P02769	0	0	1	1		6	0	6	68.49	68.49	2;3;4	1.0971e-15
RPCFSALTPDETYVPK	QM (Y)	1985.96	sp|P02769|ALBU_BOVIN;CON__P02769	0	0	1	1		3	0	3	58.421	58.421	2;3	7.4031e-10
RPCFSALTPDETYVPKAFDEK	QM (Y)	2576.23	sp|P02769|ALBU_BOVIN;CON__P02769	0	0	1	2		3	0	3	60.605	60.605	3	9.9717e-13
RPCFSALTPDETYVPKAFDEKLFTFHADICTLPDTEK	QM (T);QM (Y)	4571.17	sp|P02769|ALBU_BOVIN;CON__P02769	0	0	1	3		1	0	1	89.232	89.232	5	4.1726e-13
YICDNQDTISSK	QM (Y)	1548.68	sp|P02769|ALBU_BOVIN;CON__P02769	0	0	1	0		2	0	2	35.066	35.066	2	0.00049636
YICDNQDTISSKLK	QM (Y)	1789.86	sp|P02769|ALBU_BOVIN;CON__P02769	0	0	1	1		6	0	6	37.482	37.482	2;3	2.8015e-09
YICDNQDTISSKLK	QM (C);QM (Y)	1838.88	sp|P02769|ALBU_BOVIN;CON__P02769	0	0	1	1		1	0	1	53.897	53.897	3	4.9771e-10
YICDNQDTISSKLKECCDKPLLEK	QM (D);QM (Y)	3168.48	sp|P02769|ALBU_BOVIN;CON__P02769	0	0	1	3		2	0	2	50.891	50.891	3;5	3.9392e-30
