# Supplementary material for: Superoxide-responsive quinone methide precursors (QMP-SOs) to study superoxide biology by proximity labeling and chemoproteomics
Source: Royal Society of Chemistry journal article supplement (doi:10.1039/d4cb00111g), 2024-01-01
Supplement: d4cb00111g4.xlsx [file d4cb00111g4.xlsx]

## Sheet: Table of content
Supplementary Data 2. QMP-SO-TMT to profile proteins in HepG2 cells by QMP-SO-C5-alkyne
Worksheet	Description
Profiled proteins	Proteins in HepG2 cells treated with DMSO or menadione were labeled by QMP-SO-C5-alkyne, followed by CuAAC reaction, enrichment and LC-MS/MS analysis

## Sheet: Profiled proteins
Reporter ion ratio (Menadione/Control)	p value	log2(Reporter ion ratio)	-Log10(p)	Protein ID	Gene	Protein Description	Coverage	Reporter ion intensity-Menadione_1	Reporter ion intensity-Control_1	Reporter ion intensity-Control_2	Reporter ion intensity-Control_3	Reporter ion intensity-Menadione_2	Reporter ion intensity-Menadione_3
3.3718	0.0155315	1.75352	1.80879	P52565	ARHGDIA	Rho GDP-dissociation inhibitor 1	7.35	213467	106935	14307.5	41530.4	159297	176075
3.09273	0.232638	1.62888	0.633319	P42704	LRPPRC	Leucine-rich PPR motif-containing protein, mitochondrial	1.79	28340.4	25960	17493.9	16472.8	36202.7	120794
2.9821	0.0260778	1.57633	1.58373	Q15717	ELAVL1	ELAV-like protein 1	3.37	36426.2	14373.7	5862.26	8856.99	19485	30847.1
2.89654	0.0316461	1.53433	1.49968	P40939	HADHA	Trifunctional enzyme subunit alpha, mitochondrial	5.77	610598	325678	50336.7	137459	458373	418329
2.87802	0.0442738	1.52508	1.35385	P62910	RPL32	60S ribosomal protein L32	12.59	2.95585e+06	1.69836e+06	134383	664631	2.03746e+06	2.19418e+06
2.74984	0.0316529	1.45935	1.49959	P49006	MARCKSL1	MARCKS-related protein	6.67	175606	102167	13505.3	48107.6	126290	148473
2.68812	0.0231624	1.4266	1.63522	P05386	RPLP1	60S acidic ribosomal protein P1	14.04	579188	345392	66682.7	188208	594017	440423
2.627	0.073606	1.39341	1.13309	P29692	EEF1D	Elongation factor 1-delta	15.3	2.91707e+06	1.93803e+06	113818	649522	2.04638e+06	2.13303e+06
2.61162	0.0248774	1.38495	1.6042	P30044	PRDX5	Peroxiredoxin-5, mitochondrial	5.14	131427	82676.7	12973.4	42197.5	118675	109904
2.44446	0.0607199	1.28952	1.21667	P39019	RPS19	40S ribosomal protein S19	5.52	306002	180541	18182.4	102132	218955	210473
2.44398	0.113814	1.28923	0.943806	Q14247	CTTN	Src substrate cortactin	1.82	255712	157148	16268.9	64382.9	122163	203304
2.43012	0.0801584	1.28102	1.09605	Q09666	AHNAK	Neuroblast differentiation-associated protein AHNAK	1.22	66746.2	53298.1	6958.45	14889.3	66199.7	49667.2
2.38105	0.111829	1.2516	0.951446	P16401	H1-5	Histone H1.5	4.87	196055	115225	8134.62	66317.4	161050	94525.2
2.38039	0.00541079	1.2512	2.26674	P04406	GAPDH	Glyceraldehyde-3-phosphate dehydrogenase	27.16	2.20963e+06	1.25886e+06	592814	782209	2.16558e+06	1.89446e+06
2.36931	0.0458872	1.24447	1.33831	Q99497	PARK7	Parkinson disease protein 7	3.7	436112	261780	53090.7	144043	358208	292991
2.36916	0.110452	1.24437	0.956825	P40926	MDH2	Malate dehydrogenase, mitochondrial	37.57	9.10949e+06	5.89174e+06	586298	2.19977e+06	5.50551e+06	5.94408e+06
2.35149	0.0320394	1.23357	1.49432	P05166	PCCB	Propionyl-CoA carboxylase beta chain, mitochondrial	44.34	7.64428e+06	5.33633e+06	1.14236e+06	3.00314e+06	8.22261e+06	6.42952e+06
2.30262	0.0434266	1.20327	1.36224	P15259	PGAM2	Phosphoglycerate mutase 2	5.53	151094	115239	17855.7	66038.9	169992	137443
2.29818	0.00818595	1.20049	2.08693	O75439	PMPCB	Mitochondrial-processing peptidase subunit beta	4.29	28676.6	16376.8	7222.34	11211.7	27793.7	23531.6
2.28708	0.116436	1.19351	0.933913	Q13185	CBX3	Chromobox protein homolog 3	6.01	110259	75381	7099.24	30611	62660.3	85729.7
2.28484	0.0405683	1.19209	1.39181	P09622	DLD	Dihydrolipoyl dehydrogenase, mitochondrial	7.07	1.09627e+06	771868	126836	441403	1.03419e+06	931468
2.25114	0.0945575	1.17065	1.0243	P22392	NME2	Nucleoside diphosphate kinase B	23.68	3.87494e+06	2.59846e+06	351025	1.13629e+06	2.46642e+06	2.85625e+06
2.15777	0.0197232	1.10954	1.70502	P06733	ENO1	Alpha-enolase	35.02	4.92457e+06	3.03514e+06	1.28205e+06	1.97917e+06	4.92605e+06	3.73552e+06
2.1486	0.0776318	1.1034	1.10996	O14745	SLC9A3R1	Na(+)/H(+) exchange regulatory cofactor NHE-RF1	17.88	1.35584e+06	931271	161316	472860	957719	1.04996e+06
2.12149	0.073278	1.08508	1.13503	P10412	H1-4	Histone H1.4	5.48	85037.5	54080.1	7565.12	42235.8	77256.9	58088.3
2.10209	0.113528	1.07182	0.944897	P30086	PEBP1	Phosphatidylethanolamine-binding protein 1	11.76	449066	325197	36612.4	159596	296048	350926
2.03422	0.156729	1.02448	0.80485	P10809	HSPD1	60 kDa heat shock protein, mitochondrial	13.79	609461	445594	34837.6	219699	365513	449244
2.02665	0.164974	1.0191	0.782584	P26599	PTBP1	Polypyrimidine tract-binding protein 1	5.03	89245.7	70420	6340.83	27739.5	63998.5	58541.3
2.02183	0.0183466	1.01566	1.73644	Q16836	HADH	Hydroxyacyl-coenzyme A dehydrogenase, mitochondrial	3.5	6548.46	5061.47	2328.81	3258.64	8154.38	6827.47
2.01089	0.239217	1.00784	0.621209	Q14103	HNRNPD	Heterogeneous nuclear ribonucleoprotein D0	3.94	75458.1	53704.6	0	25516.1	37099	46747.3
1.99698	0.0967401	0.997822	1.01439	Q15084	PDIA6	Protein disulfide-isomerase A6	3.18	15115.5	11491.7	1518.66	6863.14	12945	11626.4
1.98934	0.112046	0.992293	0.950602	P00918	CA2	Carbonic anhydrase 2	10.77	211175	182823	17213.7	97581.7	188990	191901
1.9633	0.0943314	0.973284	1.02534	P05388	RPLP0	60S acidic ribosomal protein P0	5.99	146008	115144	21208.6	60040.5	126434	113138
1.9273	0.0288114	0.946579	1.54044	P49748	ACADVL	Very long-chain specific acyl-CoA dehydrogenase, mitochondrial	2.9	24077.8	15630.9	6751.15	13678.9	26027.1	19395.3
1.91485	0.140848	0.937233	0.851249	P13693	TPT1	Translationally-controlled tumor protein	4.07	701108	562146	77853.7	276379	546410	507212
1.91065	0.102791	0.934063	0.988044	P30041	PRDX6	Peroxiredoxin-6	25	573075	403670	79893.3	258714	401581	443576
1.90657	0.147205	0.930977	0.832076	P62701	RPS4X	40S ribosomal protein S4, X isoform	3.42	167596	134211	22355.2	59512.8	115855	128519
1.89574	0.21148	0.922763	0.67473	P62913	RPL11	60S ribosomal protein L11	7.87	56778.5	35077.6	3964.63	23440.9	32034.6	29638.7
1.88338	0.167207	0.913326	0.776745	P60174	TPI1	Triosephosphate isomerase	11.65	478108	413184	51681	186526	417914	330797
1.87078	0.222496	0.903641	0.652679	P49591	SARS1	Serine--tRNA ligase, cytoplasmic	1.56	100930	77542.1	7556.35	35065.1	60308.8	63560.7
1.86567	0.0362107	0.899697	1.44116	Q6NUK1	SLC25A24	Calcium-binding mitochondrial carrier protein SCaMC-1	2.73	29991.6	21195.7	8024.32	16062.6	29834.2	24656.8
1.85927	0.260674	0.894734	0.583903	P68431	H3C12	Histone H3.1	5.15	616157	497901	47606.6	186175	434213	310024
1.85043	0.208317	0.88786	0.681275	O60506	SYNCRIP	Heterogeneous nuclear ribonucleoprotein Q	7.22	1.02086e+06	918054	125857	379692	610260	1.00316e+06
1.82243	0.174313	0.865864	0.75867	P11142	HSPA8	Heat shock cognate 71 kDa protein	24.15	1.25332e+07	1.00378e+07	1.46054e+06	5.16087e+06	8.57877e+06	9.24825e+06
1.81626	0.037927	0.860974	1.42105	P58107	EPPK1	Epiplakin	9.32	126018	90251.1	36901.4	68969.4	127572	102619
1.79073	0.212593	0.840547	0.672452	P00558	PGK1	Phosphoglycerate kinase 1	24.7	5.58878e+06	4.89272e+06	656681	2085630	4.34715e+06	3.73636e+06
1.78964	0.157778	0.839667	0.801952	P04075	ALDOA	Fructose-bisphosphate aldolase A	37.91	1.11873e+07	9.51135e+06	1.52044e+06	5.07469e+06	8.69484e+06	8.94259e+06
1.7896	0.172591	0.839641	0.762982	P23396	RPS3	40S ribosomal protein S3	18.11	1.25844e+06	1.26178e+06	208971	648010	1.51075e+06	1.02256e+06
1.77894	0.242368	0.831021	0.615525	Q9NTK5	OLA1	Obg-like ATPase 1	3.79	18689.8	17053.6	1515.55	7327.52	15183	12196
1.73688	0.219785	0.796501	0.658002	Q562R1	ACTBL2	Beta-actin-like protein 2	16.76	2.40758e+07	2.23743e+07	3.20072e+06	9.69356e+06	1.73827e+07	1.97989e+07
1.72882	0.235729	0.789789	0.627586	O00571	DDX3X	ATP-dependent RNA helicase DDX3X	6.95	85898.5	87125.7	7932.42	40500.7	67573.9	80884.6
1.72028	0.0760021	0.782641	1.11917	Q7L576	CYFIP1	Cytoplasmic FMR1-interacting protein 1	0.96	13449.8	12416	4582.67	8284.12	16848.9	13194.6
1.71307	0.186545	0.776588	0.729217	P0DMV8	HSPA1A	Heat shock 70 kDa protein 1A	21.22	1.31671e+07	1.09968e+07	2.0044e+06	6.04036e+06	9.64189e+06	9.81071e+06
1.70922	0.230738	0.773339	0.636881	P31040	SDHA	Succinate dehydrogenase [ubiquinone] flavoprotein subunit, mitochondrial	7.68	173948	162462	18055.8	80735	140956	131634
1.69844	0.210211	0.764212	0.677344	P21266	GSTM3	Glutathione S-transferase Mu 3	24	529997	505835	139301	287971	699735	355096
1.69517	0.327214	0.761433	0.485168	P30050	RPL12	60S ribosomal protein L12	18.79	13096.8	12035.2	8288.66	0	14367.5	6988.15
1.68254	0.0794707	0.750645	1.09979	P80404	ABAT	4-aminobutyrate aminotransferase, mitochondrial	5.4	71014.6	59026.8	24138.1	41955.5	81564.1	57941.9
1.67147	0.115562	0.741117	0.937187	O60716	CTNND1	Catenin delta-1	3.1	7749.06	6587.89	2211.06	4668.58	5992.34	8769.17
1.66582	0.0642644	0.736235	1.19203	P49411	TUFM	Elongation factor Tu, mitochondrial	10.99	2.21597e+06	1.79124e+06	746326	1.24685e+06	2.25892e+06	1.82928e+06
1.66539	0.15529	0.735863	0.808857	P33316	DUT	Deoxyuridine 5'-triphosphate nucleotidohydrolase, mitochondrial	11.51	838168	737235	190795	473019	879268	615863
1.65049	0.261513	0.722898	0.582506	Q9Y3F4	STRAP	Serine-threonine kinase receptor-associated protein	8.29	60110.7	54255.4	8434.52	25333.8	41500.8	43671.2
1.6435	0.111623	0.716774	0.952246	Q13228	SELENBP1	Methanethiol oxidase	4.45	77635	57257.1	20224.6	43931.7	67805.3	54103.1
1.61463	0.248126	0.691205	0.605327	P55072	VCP	Transitional endoplasmic reticulum ATPase	14.27	3.45389e+06	3.21376e+06	495633	1.74768e+06	2.74227e+06	2.615e+06
1.60548	0.280916	0.683006	0.551424	Q13200	PSMD2	26S proteasome non-ATPase regulatory subunit 2	1.65	20974.9	26793.8	7019.77	8130.65	19503.9	26861.9
1.60225	0.261865	0.6801	0.581922	Q00765	REEP5	Receptor expression-enhancing protein 5	4.23	190887	194659	27671.6	101477	178047	149887
1.59711	0.151939	0.675466	0.818332	P59047	NLRP5	NACHT, LRR and PYD domains-containing protein 5	0.67	28019.8	18978.8	7070.54	15507.3	17712	20638.8
1.5961	0.431406	0.674554	0.365113	Q9Y333	LSM2	U6 snRNA-associated Sm-like protein LSm2	20	4817.91	8085.41	0	3329.11	8282.83	5118.01
1.59175	0.188302	0.67061	0.725146	Q99729	HNRNPAB	Heterogeneous nuclear ribonucleoprotein A/B	4.82	379551	372328	85641.1	250965	425967	322923
1.58468	0.319364	0.664189	0.495715	Q15056	EIF4H	Eukaryotic translation initiation factor 4H	11.69	53776.4	55867	6212.33	26271.1	48335.9	37894.7
1.58077	0.231192	0.660626	0.636026	P33176	KIF5B	Kinesin-1 heavy chain	2.6	117053	129877	24015.5	70704.8	113121	124863
1.57932	0.133942	0.659302	0.873082	Q9UL46	PSME2	Proteasome activator complex subunit 2	9.21	78912.9	70970.5	21409.7	49689	76027.5	69432.1
1.573	0.421138	0.653515	0.375576	P40222	TXLNA	Alpha-taxilin	4.95	8365.9	12301.3	0	4621.07	9654.18	8598.72
1.56949	0.108938	0.650298	0.962821	P18124	RPL7	60S ribosomal protein L7	4.44	76287.9	61488.1	22654.9	48085.7	70110.5	61133.5
1.5598	0.130284	0.641357	0.885109	P17931	LGALS3	Galectin-3	12.8	2.04227e+06	1.73824e+06	600277	1.20252e+06	1.83254e+06	1.64846e+06
1.55922	0.316396	0.640829	0.499769	P18206	VCL	Vinculin	2.47	1.37579e+07	1.29065e+07	1.58811e+06	7.05429e+06	9.73638e+06	1.01053e+07
1.54764	0.305159	0.630068	0.515473	P22234	PAICS	Bifunctional phosphoribosylaminoimidazole carboxylase/phosphoribosylaminoimidazole succinocarboxamide synthetase	5.18	404796	475404	70145.5	220234	410456	369904
1.54712	0.0827147	0.629587	1.08242	Q12792	TWF1	Twinfilin-1	3.71	13835.3	12325.7	5983.02	8496.98	15641	11995.3
1.53177	0.405346	0.615203	0.392174	Q9UM54	MYO6	Unconventional myosin-VI	0.85	6296.18	7631.17	0	10389.1	10260	11046.8
1.52845	0.278115	0.612072	0.555775	Q16576	RBBP7	Histone-binding protein RBBP7	12.47	1.41142e+06	1.37109e+06	236152	812472	1.11893e+06	1.16807e+06
1.52526	0.227956	0.609057	0.64215	P06396	GSN	Gelsolin	6.01	1.15583e+06	1.11652e+06	278374	654034	1.05382e+06	915503
1.51258	0.206468	0.59701	0.685148	O60701	UGDH	UDP-glucose 6-dehydrogenase	24.49	3.38646e+06	3.08044e+06	899908	1.91636e+06	2.91983e+06	2.61293e+06
1.51242	0.272883	0.596863	0.564024	P19338	NCL	Nucleolin	7.75	564229	503009	116436	297173	392384	429703
1.50776	0.18002	0.592406	0.74468	Q9P2E9	RRBP1	Ribosome-binding protein 1	1.28	40353.1	37346.5	13495.7	20638.4	32208.1	35214.4
1.50248	0.359228	0.587348	0.44463	Q9Y678	COPG1	Coatomer subunit gamma-1	4.69	28365.8	30957.3	5547.01	12634.8	25429.6	20035.2
1.50221	0.126697	0.587088	0.897233	P25705	ATP5F1A	ATP synthase subunit alpha, mitochondrial	8.68	589757	505967	194984	375488	514337	512945
1.50087	0.315108	0.585801	0.501541	P55786	NPEPPS	Puromycin-sensitive aminopeptidase	1.31	85065	80120.6	18534.1	44758.1	79847.1	50332.2
1.50076	0.185403	0.585697	0.731883	P05165	PCCA	Propionyl-CoA carboxylase alpha chain, mitochondrial	48.9	6.26559e+07	5.9983e+07	1.82671e+07	4.17185e+07	6.40708e+07	5.33179e+07
1.49652	0.32733	0.58161	0.485014	P62805	H4C16	Histone H4	46.6	2.86679e+06	2.49369e+06	565508	1.385e+06	2.12099e+06	1.66305e+06
1.49399	0.145659	0.579172	0.836664	P08621	SNRNP70	U1 small nuclear ribonucleoprotein 70 kDa	6.18	99613	82718.5	32756.7	58138.6	79834.5	79930
1.48332	0.0748117	0.568829	1.12603	Q5JRX3	PITRM1	Presequence protease, mitochondrial	1.83	599103	510242	249215	428344	616552	546232
1.46908	0.394699	0.55491	0.403734	Q9Y230	RUVBL2	RuvB-like 2	2.59	189171	208267	27523.3	111553	196553	124550
1.45748	0.308179	0.543472	0.511198	P13489	RNH1	Ribonuclease inhibitor	5.64	20271.9	15276.6	5102.71	10204.6	11851.6	12451.9
1.45647	0.191212	0.542477	0.718484	Q96RQ3	MCCC1	Methylcrotonoyl-CoA carboxylase subunit alpha, mitochondrial	53.52	2.54175e+08	2.37876e+08	7.69859e+07	1.77341e+08	2.37526e+08	2.25179e+08
1.45585	0.199345	0.541862	0.700394	O15144	ARPC2	Actin-related protein 2/3 complex subunit 2	10.33	235680	231760	81304.3	147991	239003	196546
1.45287	0.239792	0.538908	0.620165	P60709	ACTB	Actin, cytoplasmic 1	59.2	7.16208e+07	7.44202e+07	2.10543e+07	4.6104e+07	6.71753e+07	6.68994e+07
1.45114	0.240124	0.537191	0.619565	P63261	ACTG1	Actin, cytoplasmic 2	59.2	7.17272e+07	7.45388e+07	2.11907e+07	4.6227e+07	6.7291e+07	6.6981e+07
1.43586	0.347024	0.521919	0.459641	O15355	PPM1G	Protein phosphatase 1G	6.78	295243	320908	61645.1	177815	266066	243304
1.42956	0.216621	0.515566	0.6643	P06744	GPI	Glucose-6-phosphate isomerase	2.69	3110.2	4201.4	2982.95	2213.76	5509.67	4815.24
1.42039	0.321522	0.506291	0.49279	Q02790	FKBP4	Peptidyl-prolyl cis-trans isomerase FKBP4	18.95	838717	860813	208310	501213	705397	686381
1.41536	0.376178	0.501169	0.424607	P46776	RPL27A	60S ribosomal protein L27a	7.43	27535.3	36894.4	8252.95	18864.4	36344.5	26719.9
1.41039	0.18549	0.49609	0.731681	P11498	PC	Pyruvate carboxylase, mitochondrial	63.5	5.59489e+08	5.46744e+08	2.16062e+08	4.34698e+08	6.21903e+08	5.07552e+08
1.40714	0.238411	0.492771	0.622674	P28838	LAP3	Cytosol aminopeptidase	2.31	35249	30678.1	11483	22611.3	24743.9	31151.3
1.40548	0.34001	0.491063	0.468508	P13639	EEF2	Elongation factor 2	27.74	4.10716e+06	4.28714e+06	1.10472e+06	2.32783e+06	3.54656e+06	3.19616e+06
1.40481	0.487369	0.490378	0.312142	Q9HCC0	MCCC2	Methylcrotonoyl-CoA carboxylase beta chain, mitochondrial	6.75	126513	140933	24147.9	49320.9	83992.9	90688.1
1.39881	0.253393	0.484199	0.596205	P29401	TKT	Transketolase	4.49	240782	250005	82689.3	156795	223330	220590
1.39807	0.399442	0.483439	0.398547	Q13547	HDAC1	Histone deacetylase 1	5.19	39965.5	46887.5	6948.5	29578.7	41787.2	34867
1.39682	0.37073	0.482142	0.430943	Q13263	TRIM28	Transcription intermediary factor 1-beta	9.94	216754	215150	44398	136112	167672	168239
1.3958	0.39189	0.481094	0.406836	O60814	H2BC12	Histone H2B type 1-K	11.9	67228.4	78813.4	24813.2	43316.4	90665.3	47209.5
1.3884	0.0411129	0.473427	1.38602	Q9UHB9	SRP68	Signal recognition particle subunit SRP68	2.07	46495	28779.4	33539.3	35676.3	51205.1	38356.5
1.38403	0.28508	0.46888	0.545033	P31153	MAT2A	S-adenosylmethionine synthase isoform type-2	9.37	432525	482465	158575	310424	496774	387560
1.38345	0.279801	0.468271	0.553151	P14678	SNRPB	Small nuclear ribonucleoprotein-associated proteins B and B'	3.33	57055.6	54976.1	17591.4	40192.8	54556.8	44385.8
1.37436	0.187818	0.45876	0.726263	P35270	SPR	Sepiapterin reductase	7.28	30537.3	26293.5	11466	21846.6	26158.4	25224.6
1.36871	0.268186	0.452813	0.571564	P14618	PKM	Pyruvate kinase PKM	28.06	9.86035e+06	1.03494e+07	3.65297e+06	7.23509e+06	1.06662e+07	8.54124e+06
1.36647	0.199008	0.450452	0.70113	O95833	CLIC3	Chloride intracellular channel protein 3	16.53	39863.4	35934.2	15577.7	29049.7	37970.7	32250.9
1.36349	0.197688	0.447309	0.704019	P12956	XRCC6	X-ray repair cross-complementing protein 6	6.24	440772	436654	213414	289592	477793	362657
1.36085	0.390696	0.444505	0.408161	P38646	HSPA9	Stress-70 protein, mitochondrial	14.87	319044	324532	76287.3	201416	256529	243977
1.35959	0.382967	0.443169	0.416839	O00148	DDX39A	ATP-dependent RNA helicase DDX39A	5.62	46071.9	57657.8	13154	36606.6	54235.2	45737.6
1.35461	0.260821	0.437876	0.583657	P17174	GOT1	Aspartate aminotransferase, cytoplasmic	5.33	32526.8	30912.1	18720.5	24153.1	43484.8	23939.1
1.34981	0.475735	0.432753	0.322635	P14868	DARS1	Aspartate--tRNA ligase, cytoplasmic	1.4	615798	731872	100121	412514	522323	541723
1.3419	0.544015	0.424275	0.264389	O00757	FBP2	Fructose-1,6-bisphosphatase isozyme 2	2.95	91659.4	105566	13696.2	46926.2	57625.8	73723.2
1.33751	0.494284	0.419547	0.306023	P40429	RPL13A	60S ribosomal protein L13a	7.39	2.88402e+06	3.47368e+06	458447	1.94728e+06	2.46123e+06	2.5185e+06
1.33714	0.34885	0.419149	0.457361	P36578	RPL4	60S ribosomal protein L4	5.62	1.25593e+06	1.35707e+06	437087	850399	1.27784e+06	1.00237e+06
1.33097	0.543754	0.41248	0.264598	P47914	RPL29	60S ribosomal protein L29	9.43	558968	589951	67435.7	324270	394450	353138
1.32676	0.417669	0.407908	0.379168	P54136	RARS1	Arginine--tRNA ligase, cytoplasmic	5	65074.9	71819.6	16686	46191.8	59701	53935.2
1.31588	0.301257	0.39603	0.521063	P27695	APEX1	DNA-(apurinic or apyrimidinic site) endonuclease	5.35	24017.3	20082	9060.76	19797.9	16686.4	23696.4
1.31353	0.197029	0.393446	0.705469	P54886	ALDH18A1	Delta-1-pyrroline-5-carboxylate synthase	2.52	91074.3	85662.2	42373.5	66345	86716.3	77533.5
1.31258	0.580025	0.392401	0.236553	Q9Y3I0	RTCB	RNA-splicing ligase RtcB homolog	4.36	38038.8	50528.1	6063.14	20219.9	32164.6	30617.1
1.30584	0.482159	0.384975	0.31681	P19367	HK1	Hexokinase-1	2.84	311167	376108	78290.5	262608	377117	248011
1.30101	0.399542	0.379635	0.398437	P39023	RPL3	60S ribosomal protein L3	6.45	764019	787138	271245	462756	658365	556636
1.29514	0.422068	0.373103	0.374617	P49207	RPL34	60S ribosomal protein L34	12.82	584171	635495	191783	391871	543902	450889
1.29353	0.37948	0.371309	0.420811	P30043	BLVRB	Flavin reductase (NADPH)	11.65	315010	316219	107551	216128	261917	250797
1.29161	0.585096	0.36917	0.232773	Q86VP6	CAND1	Cullin-associated NEDD8-dissociated protein 1	0.57	158837	204136	21282.3	102173	127942	136342
1.29072	0.459356	0.368171	0.33785	P63244	RACK1	Receptor of activated protein C kinase 1	3.47	109879	134698	37355.8	76721.6	119849	91370.5
1.28712	0.547682	0.364149	0.261472	P61204	ARF3	ADP-ribosylation factor 3	5.52	167227	198822	169409	174067	389168	141608
1.27907	0.336182	0.355096	0.473426	P00338	LDHA	L-lactate dehydrogenase A chain	12.95	785825	839577	373059	545729	835030	628217
1.27485	0.509589	0.350327	0.29278	P11413	G6PD	Glucose-6-phosphate 1-dehydrogenase	25.05	8.09026e+06	8.67888e+06	2.37654e+06	4.65961e+06	6.43414e+06	5.5099e+06
1.27377	0.171268	0.349101	0.766323	Q5SSJ5	HP1BP3	Heterochromatin protein 1-binding protein 3	1.99	5137.95	4580.23	3620.07	5251.87	5154.95	6842.02
1.27339	0.185296	0.348672	0.732133	Q9H3P7	ACBD3	Golgi resident protein GCP60	6.06	395983	385622	314465	335055	548836	373319
1.26818	0.246537	0.342754	0.608118	Q9BS40	LXN	Latexin	8.11	349436	315208	172867	292736	362919	277852
1.26149	0.491676	0.335123	0.308321	P48449	LSS	Lanosterol synthase	1.91	5889.39	5220.91	2109.62	4096.48	2905.68	5619.94
1.26148	0.590199	0.335116	0.229001	P61978	HNRNPK	Heterogeneous nuclear ribonucleoprotein K	6.05	51445.8	61093.6	9543.88	32825	39889.7	39180.3
1.26049	0.436877	0.333982	0.35964	P07741	APRT	Adenine phosphoribosyltransferase	5.56	34533.6	40213.2	14484.8	22205.7	29913.7	32488.9
1.25946	0.446488	0.332804	0.350191	Q92945	KHSRP	Far upstream element-binding protein 2	4.92	72900.2	82022.4	24374.6	59554.6	72137.6	63971.4
1.25702	0.416517	0.330007	0.380367	O95994	AGR2	Anterior gradient protein 2 homolog	26.86	966777	1.1128e+06	456411	928603	1.30614e+06	866889
1.2567	0.324091	0.329642	0.489333	P62937	PPIA	Peptidyl-prolyl cis-trans isomerase A	16.36	2.99135e+06	3.37174e+06	2.17679e+06	2.49807e+06	4.35813e+06	2.76269e+06
1.2542	0.543934	0.326769	0.264453	P15880	RPS2	40S ribosomal protein S2	8.87	999127	1.03898e+06	265509	685422	901557	595061
1.25265	0.381674	0.324988	0.418308	P68104	EEF1A1	Elongation factor 1-alpha 1	28.35	1.44067e+07	1.65513e+07	7.85177e+06	1.03166e+07	1.7089e+07	1.1996e+07
1.25141	0.338185	0.323551	0.470845	P63104	YWHAZ	14-3-3 protein zeta/delta	48.16	4.88667e+06	5.00457e+06	2.32138e+06	3.70796e+06	5.0175e+06	3.90373e+06
1.25006	0.41803	0.321997	0.378792	Q7KZF4	SND1	Staphylococcal nuclease domain-containing protein 1	5.27	32048.8	41039.4	18228.9	40525.4	50509.1	42190.1
1.24917	0.498279	0.320964	0.302528	P46782	RPS5	40S ribosomal protein S5	12.75	212426	240166	67638.8	150038	185858	173637
1.24894	0.43728	0.320702	0.359241	P31939	ATIC	Bifunctional purine biosynthesis protein ATIC	8.11	710062	785032	269185	575944	739181	586727
1.24692	0.431283	0.318368	0.365238	O00299	CLIC1	Chloride intracellular channel protein 1	21.16	908925	981037	353333	668531	855566	732964
1.24593	0.344543	0.317224	0.462757	P35221	CTNNA1	Catenin alpha-1	3.31	27454.1	31766.2	16512	22369.6	35369.5	25198.8
1.24471	0.454039	0.315806	0.342907	P61158	ACTR3	Actin-related protein 3	2.63	21786.9	24700.8	8820.39	17077.6	23902.4	17291.4
1.24458	0.418075	0.315655	0.378746	Q99714	HSD17B10	3-hydroxyacyl-CoA dehydrogenase type-2	17.62	44103.1	49306.5	18975	30949.8	40914.1	38483.7
1.24138	0.345717	0.311943	0.461279	P26639	TARS1	Threonine--tRNA ligase 1, cytoplasmic	1.66	39205.6	39897.2	33378.1	33856.5	59642	34143.4
1.24012	0.394868	0.310483	0.403548	P12236	SLC25A6	ADP/ATP translocase 3	16.11	3.24457e+06	3.31689e+06	1.45874e+06	2.4726e+06	3.32105e+06	2.42309e+06
1.23801	0.683211	0.308027	0.165445	P07237	P4HB	Protein disulfide-isomerase	14.37	328379	513140	111095	140102	391379	226501
1.23112	0.403405	0.299973	0.394258	P05141	SLC25A5	ADP/ATP translocase 2	16.11	3.3177e+06	3.42747e+06	1.53954e+06	2.55811e+06	3.44723e+06	2.49941e+06
1.23044	0.601994	0.299172	0.220408	P50990	CCT8	T-complex protein 1 subunit theta	8.03	1.21324e+06	1.5023e+06	291190	833333	997226	1.02168e+06
1.22799	0.410424	0.296303	0.386768	P22314	UBA1	Ubiquitin-like modifier-activating enzyme 1	18.9	1.89171e+06	1.99607e+06	798977	1.48052e+06	1.68419e+06	1.67447e+06
1.22704	0.427445	0.295179	0.36912	Q15149	PLEC	Plectin	3.74	759322	861637	327935	726709	855937	736088
1.22565	0.452056	0.293544	0.344808	P21333	FLNA	Filamin-A	20.97	1.14171e+07	1.27352e+07	4.7291e+06	8.54748e+06	1.0505e+07	9.95925e+06
1.21625	0.38512	0.282444	0.414404	P07737	PFN1	Profilin-1	55	2.40673e+06	2.73026e+06	1.33833e+06	1.72901e+06	2.50742e+06	2.1372e+06
1.21514	0.561071	0.281117	0.250982	P53396	ACLY	ATP-citrate synthase	4.54	14003.6	20004.8	6250.57	17641.9	22733.2	16604.4
1.21331	0.634136	0.278951	0.197818	P54819	AK2	Adenylate kinase 2, mitochondrial	4.18	84142	100955	16021.1	67755.7	62386.6	77608.3
1.21313	0.283037	0.278732	0.548156	P61086	UBE2K	Ubiquitin-conjugating enzyme E2 K	7.5	33706.4	37432.4	22290.8	31284.6	42410.6	34287
1.20655	0.495801	0.270884	0.304692	Q02878	RPL6	60S ribosomal protein L6	11.81	196394	190095	71127.1	159445	166610	144551
1.20253	0.674787	0.266073	0.170833	P60842	EIF4A1	Eukaryotic initiation factor 4A-I	17.98	534432	698607	115821	362477	505460	375373
1.19634	0.47312	0.258622	0.325029	P29373	CRABP2	Cellular retinoic acid-binding protein 2	15.22	498420	596949	315614	387924	643013	414384
1.1929	0.546515	0.254478	0.262398	O43583	DENR	Density-regulated protein	9.09	9744.47	13666.4	9738.03	10666.1	19715.1	11183.3
1.19138	0.591222	0.252629	0.228249	P11216	PYGB	Glycogen phosphorylase, brain form	5.46	134428	155982	43371.1	108825	126618	106110
1.18819	0.699777	0.248765	0.15504	P62241	RPS8	40S ribosomal protein S8	16.83	820364	1.04178e+06	164277	531131	619883	623859
1.18759	0.713027	0.248039	0.146894	P27708	CAD	CAD protein	1.03	71893.4	100439	11797.9	51704	65075.8	57725.2
1.18249	0.715798	0.241831	0.14521	P48643	CCT5	T-complex protein 1 subunit epsilon	6.84	2.08319e+06	2.76032e+06	415148	1.32614e+06	1.674e+06	1.56594e+06
1.18116	0.114799	0.240208	0.940062	Q96T76	MMS19	MMS19 nucleotide excision repair protein homolog	2.23	3111.54	2847.94	2496.87	2618.55	3520.76	2773.73
1.17393	0.626249	0.231346	0.203253	P04080	CSTB	Cystatin-B	12.24	497754	611119	177920	368069	431148	429461
1.17203	0.741955	0.229005	0.129622	O43707	ACTN4	Alpha-actinin-4	10.87	4.35137e+06	5.76792e+06	780271	2.69877e+06	3.42412e+06	3.06218e+06
1.17195	0.453404	0.228909	0.343515	P04792	HSPB1	Heat shock protein beta-1	60.49	1.12206e+07	1.0818e+07	5.33127e+06	9.27804e+06	9.20847e+06	9.37045e+06
1.16967	0.505803	0.226099	0.296018	Q12906	ILF3	Interleukin enhancer-binding factor 3	9.51	1.13984e+06	1.34624e+06	562542	1.07438e+06	1.21301e+06	1.13646e+06
1.16881	0.645716	0.225038	0.189958	P20618	PSMB1	Proteasome subunit beta type-1	3.73	6793.3	8580.44	6178.55	13679.7	14876.7	11569.4
1.16684	0.814553	0.222604	0.0890805	Q15428	SF3A2	Splicing factor 3A subunit 2	2.16	41735.4	96378.9	4581.47	26361.7	46258.8	60569.9
1.16541	0.663471	0.220839	0.178178	Q96LA8	PRMT6	Protein arginine N-methyltransferase 6	5.6	3925.18	4718.45	1216.57	5302.42	5040.4	4130.66
1.16349	0.518824	0.218458	0.28498	P78371	CCT2	T-complex protein 1 subunit beta	10.65	661419	747046	338493	503130	628874	558107
1.16269	0.513682	0.217469	0.289306	Q96I24	FUBP3	Far upstream element-binding protein 3	1.75	211466	238881	105940	169844	187742	199189
1.16264	0.605168	0.2174	0.218124	P51570	GALK1	Galactokinase	10.97	128573	181379	68133.5	107854	157999	128915
1.15981	0.446924	0.21389	0.349766	P55060	CSE1L	Exportin-2	1.96	59729	57533	36741.3	45452.7	61197.6	41130.4
1.15447	0.598125	0.207236	0.223208	P61026	RAB10	Ras-related protein Rab-10	5.5	78486.5	78563.7	34696.5	57762.4	69959.5	48995.2
1.1544	0.613	0.207139	0.21254	Q9BZZ5	API5	Apoptosis inhibitor 5	2.48	6658.75	9369.01	4175.93	4830.53	8180.55	6373.29
1.15415	0.646734	0.206826	0.189274	O75390	CS	Citrate synthase, mitochondrial	2.58	3337.91	3281.96	1949.3	2047.75	3504.38	1558.75
1.14875	0.612128	0.200068	0.213158	Q13409	DYNC1I2	Cytoplasmic dynein 1 intermediate chain 2	3.29	54303	57554.1	20889.1	49309.9	43495.9	48957.9
1.14789	0.657056	0.19898	0.182398	Q8NDH3	NPEPL1	Probable aminopeptidase NPEPL1	2.29	20016.7	24683.3	7327.04	17402.7	17486.7	19217.2
1.1439	0.663337	0.193956	0.178266	Q15393	SF3B3	Splicing factor 3B subunit 3	2.88	98657.2	90549.5	33929.2	80613.7	77498.1	58449
1.14182	0.702415	0.191341	0.153406	Q06323	PSME1	Proteasome activator complex subunit 1	12.85	516383	615944	180795	376081	470765	352005
1.13358	0.508375	0.180882	0.293815	P02545	LMNA	Prelamin-A/C	3.77	27588.5	33706.5	19485.2	29571.5	36820.3	29409.7
1.12801	0.663758	0.173785	0.17799	Q15738	NSDHL	Sterol-4-alpha-carboxylate 3-dehydrogenase, decarboxylating	5.09	19424.7	23576.2	11978.4	13695.9	22598.2	13532.4
1.12735	0.67243	0.172938	0.172353	P60900	PSMA6	Proteasome subunit alpha type-6	8.94	39444.5	47464	15782.3	38237.3	38764	36199.4
1.12467	0.693728	0.169498	0.158811	O75369	FLNB	Filamin-B	10.42	4.17044e+06	5.12232e+06	1.66051e+06	3.56205e+06	3.87967e+06	3.58444e+06
1.12428	0.72671	0.168998	0.138639	P48735	IDH2	Isocitrate dehydrogenase [NADP], mitochondrial	4.42	171661	184361	60673.7	127447	145370	101743
1.1109	0.73305	0.15173	0.134866	P50991	CCT4	T-complex protein 1 subunit delta	8.35	76171.8	88801	31189.8	64975.4	77539.7	51767.7
1.11067	0.791686	0.151432	0.101447	P32119	PRDX2	Peroxiredoxin-2	15.66	1.46282e+06	1.97227e+06	431677	1.07999e+06	1.23293e+06	1.17376e+06
1.10712	0.615308	0.146814	0.210907	P00568	AK1	Adenylate kinase isoenzyme 1	7.22	22816.6	29288.8	15012.2	22563.6	27647.5	23563.3
1.10344	0.634934	0.142007	0.197272	P52209	PGD	6-phosphogluconate dehydrogenase, decarboxylating	15.94	878337	1.016e+06	592687	821577	1.08858e+06	714735
1.10212	0.75751	0.140277	0.120612	P14174	MIF	Macrophage migration inhibitory factor	17.39	89616	113474	41892.8	90190.5	114671	66346.2
1.09938	0.616518	0.136696	0.210054	P52272	HNRNPM	Heterogeneous nuclear ribonucleoprotein M	2.19	17498.8	18218.5	15428	13717.9	21753.6	12819.4
1.09923	0.753594	0.13649	0.122863	Q8IWB7	WDFY1	WD repeat and FYVE domain-containing protein 1	2.68	4842.25	7005.06	2427.45	4185.75	5251.26	4876.04
1.0989	0.75763	0.136055	0.120543	P53621	COPA	Coatomer subunit alpha	1.72	57058.1	78936.3	24926.7	55076.9	63333.2	54267.3
1.09629	0.740368	0.132636	0.130552	P33993	MCM7	DNA replication licensing factor MCM7	2.09	12683.6	18003.2	7133.89	12825	16631.5	12302.5
1.0955	0.834384	0.131595	0.0786338	P09467	FBP1	Fructose-1,6-bisphosphatase 1	4.73	772926	1.15757e+06	195619	630636	781324	619040
1.09228	0.730964	0.127338	0.136104	Q5J8M3	EMC4	ER membrane protein complex subunit 4	6.56	8203.75	9622.5	4017.05	6599.79	7343.82	6559.38
1.08971	0.738689	0.123947	0.131538	P30101	PDIA3	Protein disulfide-isomerase A3	9.7	318064	421477	204915	217443	308095	293377
1.08939	0.638531	0.123523	0.194818	P32969	RPL9P9	60S ribosomal protein L9	5.21	90979.3	107834	62770.4	91603.5	110629	84038.6
1.08622	0.685838	0.119313	0.163779	P31948	STIP1	Stress-induced-phosphoprotein 1	3.5	343404	401091	204736	372438	393951	325254
1.08587	0.698964	0.118857	0.155545	Q7Z406	MYH14	Myosin-14	1.9	12093.8	13848.8	6701.54	11492	10274.8	12425.4
1.08317	0.677547	0.115263	0.169061	P22626	HNRNPA2B1	Heterogeneous nuclear ribonucleoproteins A2/B1	28.61	755745	936690	639534	743610	1.06332e+06	693712
1.07667	0.775598	0.106578	0.110363	P45880	VDAC2	Voltage-dependent anion-selective channel protein 2	7.48	150756	196350	89593.6	115872	157529	124339
1.07605	0.780968	0.105744	0.107367	P04908	H2AC8	Histone H2A type 1-B/E	21.54	587640	599436	561930	471221	816385	352719
1.07512	0.578464	0.1045	0.237724	P19623	SRM	Spermidine synthase	3.31	93139.7	101570	66329.8	92239.4	97224.5	89317
1.07418	0.793588	0.103237	0.100405	P07477	PRSS1	Serine protease 1	8.1	109145	129613	47095.9	102988	95989	95310.6
1.0706	0.807006	0.0984202	0.0931234	P25398	RPS12	40S ribosomal protein S12	24.24	1.19035e+06	1.50965e+06	568488	1.00008e+06	998795	1.1064e+06
1.06752	0.753161	0.0942665	0.123112	P17844	DDX5	Probable ATP-dependent RNA helicase DDX5	4.56	47290	57952.8	29680.5	43462.4	51806.4	40851.2
1.06361	0.796815	0.0889759	0.0986423	P55735	SEC13	Protein SEC13 homolog	5.28	18164.6	25260.7	15321.5	17693.3	27283.2	16534.9
1.06269	0.857481	0.0877151	0.0667754	P17987	TCP1	T-complex protein 1 subunit alpha	1.98	22861.7	33242.6	10748.7	26278.6	32287.5	19525.6
1.06239	0.837856	0.0873095	0.0768308	O75874	IDH1	Isocitrate dehydrogenase [NADP] cytoplasmic	6.28	162440	178814	70224.5	129674	138519	101380
1.05652	0.844782	0.0793246	0.0732555	P26640	VARS1	Valine--tRNA ligase	4.59	68421.3	86961.4	31656.4	62277.1	57501.5	65196.9
1.0527	0.774054	0.0740936	0.111229	Q14847	LASP1	LIM and SH3 domain protein 1	4.98	216030	246060	145130	243180	250684	201088
1.05198	0.793121	0.073102	0.100661	P15924	DSP	Desmoplakin	0.66	17128	24115.1	13310.4	17685.8	19141.6	21706.3
1.04622	0.788494	0.0651885	0.103202	P61981	YWHAG	14-3-3 protein gamma	23.48	2.06479e+06	2.40105e+06	1.43763e+06	1.92987e+06	2.21728e+06	1.7531e+06
1.0428	0.806569	0.0604558	0.0933587	Q07955	SRSF1	Serine/arginine-rich splicing factor 1	9.68	117973	125083	74512	129875	108472	117124
1.04094	0.844881	0.0578815	0.0732045	P51991	HNRNPA3	Heterogeneous nuclear ribonucleoprotein A3	14.55	589621	770186	560923	604895	888420	537216
1.03627	0.892201	0.0513956	0.0495372	Q00610	CLTC	Clathrin heavy chain 1	13.85	2.99115e+06	4.23824e+06	1.86793e+06	3.06228e+06	3.83867e+06	2.67115e+06
1.03504	0.733926	0.0496827	0.134348	P14625	HSP90B1	Endoplasmin	5.23	188160	194855	193496	192300	236841	175994
1.0313	0.889293	0.0444642	0.0509552	Q02218	OGDH	2-oxoglutarate dehydrogenase complex component E1	1.37	19966.5	26929.2	20384.4	20422.8	31704.2	18185.9
1.03067	0.902186	0.0435887	0.0447039	P04632	CAPNS1	Calpain small subunit 1	8.96	19680.4	28336.2	14053.2	19632.4	26199.6	18044.3
1.02977	0.91729	0.0423167	0.0374933	Q96AE4	FUBP1	Far upstream element-binding protein 1	3.57	32032.7	38756.2	16769.4	22883.3	24676.2	24033.9
1.02923	0.908438	0.0415685	0.0417047	P26641	EEF1G	Elongation factor 1-gamma	11.67	1.38618e+06	1.85624e+06	784073	1.37666e+06	1.50815e+06	1.24006e+06
1.02723	0.904404	0.0387542	0.0436374	Q9Y490	TLN1	Talin-1	1.22	17600.5	21313.4	14498.9	20029.8	25560.7	14201.2
1.02585	0.924355	0.0368171	0.0341613	P38606	ATP6V1A	V-type proton ATPase catalytic subunit A	2.43	3722.14	5498.15	3241.72	4639.2	6436.51	3566.24
1.02469	0.911712	0.0351888	0.0401422	P11586	MTHFD1	C-1-tetrahydrofolate synthase, cytoplasmic	10.37	572773	745903	345026	607197	607268	560013
1.0237	0.946821	0.0337929	0.0237319	Q99832	CCT7	T-complex protein 1 subunit eta	7.92	2.59743e+06	3.68392e+06	1.00124e+06	2.35036e+06	2.40865e+06	2.19619e+06
1.02307	0.936794	0.032907	0.0283561	P07900	HSP90AA1	Heat shock protein HSP 90-alpha	28.83	4.37961e+06	5.9523e+06	2.15609e+06	4.17878e+06	4.44994e+06	3.7411e+06
1.01953	0.942651	0.027911	0.025649	Q06210	GFPT1	Glutamine--fructose-6-phosphate aminotransferase [isomerizing] 1	4.15	48782.1	59412.1	28534.6	48280.5	57445.8	32660.4
1.01863	0.969041	0.0266311	0.013658	Q13247	SRSF6	Serine/arginine-rich splicing factor 6	3.49	39353.3	59023.8	9395.73	29736.1	32338.2	28292.8
1.0118	0.982355	0.0169189	0.00773143	Q7L014	DDX46	Probable ATP-dependent RNA helicase DDX46	1.26	5363.4	8403.32	0	7735.54	5447.89	5517.96
0.995028	0.984085	-0.0071915	0.00696733	Q99613	EIF3C	Eukaryotic translation initiation factor 3 subunit C	6.46	27094.9	44190.5	21141.7	29123.4	29864	37027
0.987861	0.945396	-0.0176195	0.024386	P27348	YWHAQ	14-3-3 protein theta	16.33	2.77888e+06	3.42644e+06	1.96509e+06	3.03329e+06	3.06229e+06	2.48138e+06
0.971895	0.850807	-0.0411284	0.0701692	P62258	YWHAE	14-3-3 protein epsilon	11.37	1.69642e+06	2.1116e+06	1.41968e+06	1.80452e+06	2.00033e+06	1.48908e+06
0.971644	0.887917	-0.0414998	0.0516275	P49756	RBM25	RNA-binding protein 25	2.14	21570.2	30517.9	16003	27465.1	26649.7	23668.2
0.970447	0.861962	-0.0432785	0.0645119	O75828	CBR3	Carbonyl reductase [NADPH] 3	10.47	56716.4	65907.8	39023.7	65864.9	52278	56754.4
0.964653	0.898527	-0.0519178	0.0464691	P08238	HSP90AB1	Heat shock protein HSP 90-beta	34.25	5.18507e+06	7.4248e+06	2.91087e+06	5.01969e+06	5.23357e+06	4.39395e+06
0.955609	0.459735	-0.0655071	0.337492	P23284	PPIB	Peptidyl-prolyl cis-trans isomerase B	4.17	36892.5	37423.5	39423.2	38638.3	40211.1	33255
0.952339	0.827892	-0.0704523	0.0820264	Q9H993	ARMT1	Damage-control phosphatase ARMT1	6.35	294751	449766	300990	348296	470879	281040
0.946016	0.786969	-0.0800641	0.104042	P52907	CAPZA1	F-actin-capping protein subunit alpha-1	5.24	26320.1	37729.8	28018.5	31444.7	41274.2	24351.9
0.938161	0.847665	-0.0920932	0.071776	P49588	AARS1	Alanine--tRNA ligase, cytoplasmic	3.51	127791	170729	53345.2	130871	109758	95447.5
0.935123	0.755048	-0.0967719	0.122026	P07355	ANXA2	Annexin A2	15.04	618075	968667	523796	712818	809546	634588
0.930302	0.837542	-0.104229	0.0769934	P05198	EIF2S1	Eukaryotic translation initiation factor 2 subunit 1	3.81	25574.8	43468.8	12227	30954.2	25161.2	29874.8
0.928779	0.750157	-0.106593	0.124848	P31146	CORO1A	Coronin-1A	3.47	48774	70801.8	32883.9	57536.8	53013	47953
0.928261	0.873534	-0.107398	0.0587203	P06748	NPM1	Nucleophosmin	17.01	716232	1.22266e+06	222781	648522	692085	535425
0.928177	0.818115	-0.107528	0.0871857	P11940	PABPC1	Polyadenylate-binding protein 1	4.09	14060.6	26138.2	9036.91	17120.1	18438.3	16040.3
0.92792	0.837864	-0.107928	0.0768265	P23526	AHCY	Adenosylhomocysteinase	10.42	234278	364501	103423	232940	232061	184006
0.922935	0.721157	-0.115698	0.14197	Q9HAU5	UPF2	Regulator of nonsense transcripts 2	0.55	237047	286318	155987	269379	249462	170329
0.922324	0.620057	-0.116655	0.207569	P08758	ANXA5	Annexin A5	5	161454	227132	137069	179106	172709	166942
0.918332	0.78556	-0.122912	0.10482	P50747	HLCS	Biotin--protein ligase	3.99	54505.6	72454.7	28177.4	62934.9	59882.5	35820.7
0.91081	0.767351	-0.134778	0.115006	P35579	MYH9	Myosin-9	1.99	222700	259828	102265	202081	136566	154589
0.902266	0.873536	-0.148375	0.0587193	P61513	RPL37A	60S ribosomal protein L37a	19.57	5559.29	8536.46	2941.2	5719.7	9957.3	0
0.899724	0.714014	-0.152445	0.146293	P49327	FASN	Fatty acid synthase	14.89	4.31895e+06	6.93326e+06	2.82935e+06	4.66264e+06	4.85666e+06	3.80314e+06
0.892656	0.751696	-0.163824	0.123958	P35998	PSMC2	26S proteasome regulatory subunit 7	3	35594.5	55139	15822.3	37961.7	30078.7	31557.6
0.89257	0.721766	-0.163964	0.141603	O94979	SEC31A	Protein transport protein Sec31A	0.74	18109.7	26999.3	9943.28	17430.6	16618.8	13803.4
0.892224	0.660322	-0.164522	0.180244	P23528	CFL1	Cofilin-1	27.71	1.76395e+06	2.87652e+06	1.26122e+06	2.03626e+06	1.90038e+06	1.84426e+06
0.887575	0.685595	-0.172058	0.163932	Q15102	PAFAH1B3	Platelet-activating factor acetylhydrolase IB subunit alpha1	7.36	76111.2	132965	50605.3	95949.4	85208.2	86775.5
0.884495	0.69162	-0.177075	0.160133	P13804	ETFA	Electron transfer flavoprotein subunit alpha, mitochondrial	5.41	2089.79	2956.8	4827.7	2466.26	4090.66	2886.29
0.875373	0.63247	-0.192031	0.19896	Q9UQ35	SRRM2	Serine/arginine repetitive matrix protein 2	1.24	77163.4	105249	43913.1	91935.6	74048.7	59837.9
0.870409	0.595935	-0.200235	0.224801	P46940	IQGAP1	Ras GTPase-activating-like protein IQGAP1	3.32	320370	468470	203109	373566	308048	281286
0.858321	0.546947	-0.220411	0.262055	Q14204	DYNC1H1	Cytoplasmic dynein 1 heavy chain 1	0.99	67147.4	104834	52667.9	67819.6	70933.3	55317.1
0.84498	0.265461	-0.243012	0.576	P51148	RAB5C	Ras-related protein Rab-5C	5.56	25167.8	30027	30494.3	27368.3	30380.2	18716.9
0.84458	0.103515	-0.243694	0.984998	Q9BR76	CORO1B	Coronin-1B	11.86	527502	761365	703179	657252	675040	589485
0.844382	0.688411	-0.244032	0.162152	P13667	PDIA4	Protein disulfide-isomerase A4	3.26	151581	310504	114402	122845	182265	128665
0.843613	0.553508	-0.245347	0.256876	O43681	GET3	ATPase GET3	12.36	217402	370586	156815	273780	261438	197046
0.837355	0.651116	-0.256088	0.186342	P62851	RPS25	40S ribosomal protein S25	15.2	144929	232409	76133.1	124200	118248	99181.8
0.833294	0.41293	-0.263102	0.384124	O95819	MAP4K4	Mitogen-activated protein kinase kinase kinase kinase 4	0.56	930989	1.42448e+06	763397	1164614	1.04964e+06	812979
0.822484	0.288002	-0.281941	0.540605	Q14697	GANAB	Neutral alpha-glucosidase AB	5.51	893717	1.50086e+06	948430	1.10333e+06	1.06317e+06	965088
0.818075	0.359166	-0.289695	0.444705	P84103	SRSF3	Serine/arginine-rich splicing factor 3	14.02	74516.2	141811	90024	95052.1	107616	85285.4
0.817606	0.375709	-0.290522	0.425149	P42694	HELZ	Probable helicase with zinc finger domain	1.03	40998.4	68279.8	40407.6	71911.4	57448.7	49211.5
0.807374	0.255063	-0.308691	0.593352	Q02543	RPL18A	60S ribosomal protein L18a	13.07	317355	559841	434636	478627	516654	355336
0.804687	0.29177	-0.3135	0.53496	P49368	CCT3	T-complex protein 1 subunit gamma	8.26	347367	552333	315038	456387	387963	329881
0.803541	0.682828	-0.315556	0.165688	Q06830	PRDX1	Peroxiredoxin-1	35.68	2.011e+07	3.92976e+07	5.45864e+06	2.14566e+07	1.56097e+07	1.74852e+07
0.794371	0.295209	-0.332115	0.52987	Q08211	DHX9	ATP-dependent RNA helicase A	4.57	369609	539880	309530	431498	368630	279278
0.77994	0.152738	-0.358565	0.816054	Q8N163	CCAR2	Cell cycle and apoptosis regulator protein 2	1.95	13486.5	18720.2	17254.5	23910.6	18384.2	14836.2
0.767172	0.410995	-0.382378	0.386164	Q9Y383	LUC7L2	Putative RNA-binding protein Luc7-like 2	2.3	45662.7	80899.6	31421.1	58683.5	46129.5	39397.5
0.765078	0.361663	-0.386321	0.441696	Q9NQ29	LUC7L	Putative RNA-binding protein Luc7-like 1	4.04	4295.08	9181.65	5352.75	6751.35	7771.55	4218.63
0.762606	0.515004	-0.39099	0.28819	O00763	ACACB	Acetyl-CoA carboxylase 2	9.68	1.01265e+07	1.95008e+07	5.32859e+06	1.24509e+07	1.00278e+07	8.27589e+06
0.754352	0.235573	-0.40669	0.627875	Q14657	LAGE3	EKC/KEOPS complex subunit LAGE3	16.08	6206.96	12474.5	7506.23	12222.7	8583.66	9502.14
0.749803	0.344912	-0.415416	0.462292	P31949	S100A11	Protein S100-A11	23.81	704362	1.17069e+06	604863	685766	674556	466588
0.740578	0.421808	-0.433277	0.374885	Q71U36	TUBA1A	Tubulin alpha-1A chain	35.48	7.1107e+06	1.55052e+07	5.94629e+06	1.0716e+07	1.07387e+07	5.97303e+06
0.740386	0.340552	-0.433651	0.467816	P38117	ETFB	Electron transfer flavoprotein subunit beta	3.92	41647.8	65304.5	29661.5	43842.8	33303	27821.3
0.739872	0.42122	-0.434653	0.375491	Q9BQE3	TUBA1C	Tubulin alpha-1C chain	31.4	7.15606e+06	1.56274e+07	5.97677e+06	1.07762e+07	1.07885e+07	6.01276e+06
0.726136	0.296892	-0.461688	0.527401	Q14974	KPNB1	Importin subunit beta-1	4.91	218628	419160	183171	322156	254400	198275
0.720863	0.0397718	-0.472202	1.40042	P47897	QARS1	Glutamine--tRNA ligase	3.23	126571	193902	142307	187270	125745	125041
0.690003	0.322481	-0.535326	0.491496	P35268	RPL22	60S ribosomal protein L22	11.72	11967.6	25006.4	9637.9	22103.8	9912.76	17276
0.679672	0.152272	-0.55709	0.817379	O75131	CPNE3	Copine-3	3.72	842829	1.67377e+06	926424	1.46216e+06	1.12715e+06	791086
0.663611	0.126656	-0.591591	0.897376	P63241	EIF5A	Eukaryotic translation initiation factor 5A-1	43.51	1.35828e+06	2.67538e+06	1.45399e+06	2.14789e+06	1.56328e+06	1.24409e+06
0.661628	0.258216	-0.595907	0.588016	P14866	HNRNPL	Heterogeneous nuclear ribonucleoprotein L	1.87	56239	135661	62949.6	78515.8	77916.4	49199.6
0.659394	0.208282	-0.600788	0.681348	P20073	ANXA7	Annexin A7	4.92	131429	256569	109880	205564	130752	115000
0.650597	0.323289	-0.620163	0.490409	Q13085	ACACA	Acetyl-CoA carboxylase 1	42.16	7.72806e+07	1.7296e+08	5.05463e+07	1.19528e+08	7.55236e+07	7.03735e+07
0.650046	0.29391	-0.621386	0.531786	P09525	ANXA4	Annexin A4	8.15	7371.76	15894.7	5601.19	9978.27	7461.01	5626.92
0.645476	0.232318	-0.631565	0.633917	Q7Z4W1	DCXR	L-xylulose reductase	4.51	17695.8	16142.7	28750	39012.5	22449.6	14013.3
0.645237	0.140972	-0.632099	0.850869	P78417	GSTO1	Glutathione S-transferase omega-1	5.81	5686.93	14884.4	11943.2	8558.56	6880.73	10264.8
0.628585	0.0523818	-0.669821	1.28082	P17858	PFKL	ATP-dependent 6-phosphofructokinase, liver type	4.62	253847	508928	336660	450906	329971	231138
0.623686	0.196124	-0.681109	0.70747	P07437	TUBB	Tubulin beta chain	32.43	2.59565e+06	5.51946e+06	2.30357e+06	3.85811e+06	2.61739e+06	2.07232e+06
0.60987	0.17859	-0.713426	0.748144	P68371	TUBB4B	Tubulin beta-4B chain	35.73	2.98442e+06	6.51276e+06	2.79311e+06	4.51011e+06	3.11987e+06	2.32167e+06
0.597937	0.597106	-0.741935	0.223949	P30153	PPP2R1A	Serine/threonine-protein phosphatase 2A 65 kDa regulatory subunit A alpha isoform	17.83	168330	529232	38861.6	97680.8	118624	111137
0.588773	0.287086	-0.764217	0.541988	P31943	HNRNPH1	Heterogeneous nuclear ribonucleoprotein H	11.8	788484	1.78444e+06	543922	983405	605463	555930
0.58719	0.0627216	-0.7681	1.20258	Q68E01	INTS3	Integrator complex subunit 3	2.68	11159.1	24754.6	14337.9	23853.9	12671.1	13131.2
0.583692	0.2065	-0.77672	0.68508	Q00839	HNRNPU	Heterogeneous nuclear ribonucleoprotein U	3.52	542534	1.12146e+06	385678	888280	446615	409040
0.535153	0.235646	-0.901976	0.627739	Q9C0C2	TNKS1BP1	182 kDa tankyrase-1-binding protein	1.16	1140.69	1952.63	973.935	1365.29	0	1156.12
0.497453	0.00682521	-1.00737	2.16588	P08133	ANXA6	Annexin A6	1.34	24819.7	61765.6	44731.1	57388.7	26507.9	30197.8
0.493694	0.0212587	-1.01831	1.67246	P51530	DNA2	DNA replication ATP-dependent helicase/nuclease DNA2	1.13	439727	1.26464e+06	960161	1.19523e+06	816956	431764
0.475853	0.182116	-1.07141	0.739651	Q9H2J4	PDCL3	Phosducin-like protein 3	4.6	963.745	3284.18	920.599	2095.38	1026.41	1007.8
0.423641	0.497523	-1.23909	0.303187	P00352	ALDH1A1	Aldehyde dehydrogenase 1A1	2.59	5315.78	31974.2	6069.8	0	5819.98	4981.25
0.381317	0.346005	-1.39094	0.460918	P12277	CKB	Creatine kinase B-type	4.2	26800.9	184859	43034	31049	48777.9	23160.2
