# Supplementary material for: Superoxide-responsive quinone methide precursors (QMP-SOs) to study superoxide biology by proximity labeling and chemoproteomics
Source: Royal Society of Chemistry journal article supplement (doi:10.1039/d4cb00111g), 2024-01-01
Supplement: d4cb00111g5.pdf [file d4cb00111g5.pdf]

**For review process – access to proteomics MS raw data in PRIDE database  
(<https://www.ebi.ac.uk/pride/>)**

Reviewer account details:

**Project Name:** Superoxide-induced covalent modifications of bovine serum albumin by QMP-SO

**Project accession:** PXD052283

**Username:** reviewer\_pxd052283@ebi.ac.uk

**Password:** iJYwIAOTSiQ9

**Project Name:** QMP-SO-TMT chemoproteomics to study proteins associate with superoxide biology in HepG2 cells treated with menadione

**Project accession:** PXD052284

**Username:** reviewer\_pxd052284@ebi.ac.uk

**Password:** D2r2czCZGLUG
